# Supplementary material
Source: MDPI journal article supplement (https://www.mdpi.com/2304-6740/4/3/25)
Supplement: s1 [file s1]

# Supplementary Materials: The *Trans* Influence in Unsymmetrical Pincer Palladacycles: An Experimental and Computational Study

Sarote Boonseng, Gavin W. Roffe, Rhiannon N. Jones, Graham J. Tizzard, Simon J. Coles, John Spencer and Hazel Cox

## S1. QTAIM Analysis Data

**Table S1.** Topological analysis of AIM at BCP of Pd–Cl bond. The electron density  $\rho(\mathbf{r})$ , Laplacian of the electron density  $\nabla^2\rho(\mathbf{r})$ , total energy  $H(\mathbf{r})$ , bond pressure  $|H(\mathbf{r})/\rho(\mathbf{r})|$ , ellipticity  $\epsilon$ , and delocalization index  $\delta(\text{Pd–Cl})$  and Pd–Cl bond lengths. All values of AIM are in a.u. (atomic units) and Pd–Cl bond lengths are in Å.

| Compound | $\rho(\mathbf{r})$ | $\nabla^2\rho(\mathbf{r})$ | $H(\mathbf{r})$ | $ H(\mathbf{r})/\rho(\mathbf{r}) $ | $\epsilon$ | $\delta(\text{Pd–Cl})$ | Bond Length |
|----------|--------------------|----------------------------|-----------------|------------------------------------|------------|------------------------|-------------|
| I        | 0.080              | 0.254                      | −0.017          | 0.213                              | 0.102      | 1.361                  | 2.334       |
| II       | 0.077              | 0.247                      | −0.016          | 0.208                              | 0.108      | 1.313                  | 2.352       |
| III      | 0.070              | 0.232                      | −0.013          | 0.186                              | 0.124      | 1.239                  | 2.395       |

**Table S2.** The electron density  $\rho(\mathbf{r})$ , Laplacian of the electron density  $\nabla^2\rho(\mathbf{r})$ , total energy  $H(\mathbf{r})$ , bond pressure  $|H(\mathbf{r})/\rho(\mathbf{r})|$ , ellipticity  $\epsilon$ , delocalisation index  $\delta(\text{Pd}-\text{Y})$  in symmetrical and unsymmetrical pincer palladacycles (values are in atomic units). The donor atoms are shown in bold.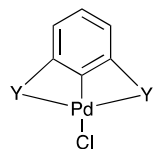

| PdYCY'  | Y                                                 | Y'                               | Pd-Y               |                            |                 |                                    |            |                              | Pd-Y'              |                            |                 |                                    |            |                               |
|---------|---------------------------------------------------|----------------------------------|--------------------|----------------------------|-----------------|------------------------------------|------------|------------------------------|--------------------|----------------------------|-----------------|------------------------------------|------------|-------------------------------|
|         |                                                   |                                  | $\rho(\mathbf{r})$ | $\nabla^2\rho(\mathbf{r})$ | $H(\mathbf{r})$ | $ H(\mathbf{r})/\rho(\mathbf{r}) $ | $\epsilon$ | $\delta(\text{Pd}-\text{Y})$ | $\rho(\mathbf{r})$ | $\nabla^2\rho(\mathbf{r})$ | $H(\mathbf{r})$ | $ H(\mathbf{r})/\rho(\mathbf{r}) $ | $\epsilon$ | $\delta(\text{Pd}-\text{Y}')$ |
| PdNCN * | NMe <sub>2</sub> CH <sub>2</sub>                  | NMe <sub>2</sub> CH <sub>2</sub> | 0.086              | 0.383                      | −0.014          | 0.163                              | 0.033      | 0.908                        | 0.086              | 0.383                      | −0.014          | 0.163                              | 0.033      | 0.908                         |
| PdSCS * | SMeCH <sub>2</sub>                                | SMeCH <sub>2</sub>               | 0.091              | 0.257                      | −0.025          | 0.275                              | 0.040      | 1.157                        | 0.091              | 0.257                      | −0.025          | 0.275                              | 0.040      | 1.157                         |
| PdPCP * | PMe <sub>2</sub> CH <sub>2</sub>                  | PMe <sub>2</sub> CH <sub>2</sub> | 0.101              | 0.183                      | −0.036          | 0.356                              | 0.022      | 1.124                        | 0.101              | 0.183                      | −0.036          | 0.356                              | 0.022      | 1.124                         |
| IV      | SMeCH <sub>2</sub>                                | NMe <sub>2</sub> CH <sub>2</sub> | 0.097              | 0.271                      | −0.028          | 0.289                              | 0.039      | 1.217                        | 0.083              | 0.369                      | −0.013          | 0.157                              | 0.046      | 0.883                         |
| V       | PMe <sub>2</sub> CH <sub>2</sub>                  | SMeCH <sub>2</sub>               | 0.110              | 0.170                      | −0.043          | 0.391                              | 0.012      | 1.194                        | 0.082              | 0.241                      | −0.021          | 0.256                              | 0.064      | 1.073                         |
| VI      | PMe <sub>2</sub> CH <sub>2</sub>                  | NMe <sub>2</sub> CH <sub>2</sub> | 0.114              | 0.169                      | −0.046          | 0.404                              | 0.006      | 1.243                        | 0.075              | 0.333                      | −0.010          | 0.133                              | 0.064      | 0.828                         |
| 1a      | SMeCH <sub>2</sub>                                | 2-NC <sub>5</sub> H <sub>4</sub> | 0.096              | 0.273                      | −0.027          | 0.281                              | 0.047      | 1.208                        | 0.098              | 0.465                      | −0.018          | 0.184                              | 0.012      | 0.979                         |
| 1b      | SEtCH <sub>2</sub>                                | 2-NC <sub>5</sub> H <sub>4</sub> | 0.095              | 0.270                      | −0.027          | 0.284                              | 0.044      | 1.203                        | 0.098              | 0.463                      | −0.018          | 0.184                              | 0.012      | 0.977                         |
| 1c      | SPrCH <sub>2</sub>                                | 2-NC <sub>5</sub> H <sub>4</sub> | 0.095              | 0.269                      | −0.027          | 0.284                              | 0.046      | 1.202                        | 0.098              | 0.463                      | −0.018          | 0.184                              | 0.011      | 0.977                         |
| 1d      | SPhCH <sub>2</sub>                                | 2-NC <sub>5</sub> H <sub>4</sub> | 0.092              | 0.267                      | −0.025          | 0.272                              | 0.041      | 1.188                        | 0.098              | 0.456                      | −0.018          | 0.184                              | 0.015      | 0.977                         |
| 1e      | S( <i>p</i> -MePh)CH <sub>2</sub>                 | 2-NC <sub>5</sub> H <sub>4</sub> | 0.092              | 0.266                      | −0.025          | 0.272                              | 0.039      | 1.189                        | 0.098              | 0.458                      | −0.018          | 0.184                              | 0.015      | 0.977                         |
| 1f      | S( <i>p</i> -MeOPh)CH <sub>2</sub>                | 2-NC <sub>5</sub> H <sub>4</sub> | 0.092              | 0.265                      | −0.025          | 0.272                              | 0.037      | 1.187                        | 0.098              | 0.458                      | −0.018          | 0.184                              | 0.015      | 0.977                         |
| 2a      | PPh <sub>2</sub> O                                | 2-NC <sub>5</sub> H <sub>4</sub> | 0.114              | 0.191                      | −0.045          | 0.395                              | 0.020      | 1.235                        | 0.087              | 0.409                      | −0.013          | 0.149                              | 0.006      | 0.919                         |
| 2b      | PPh <sub>2</sub> OCH <sub>2</sub>                 | 2-NC <sub>5</sub> H <sub>4</sub> | 0.113              | 0.180                      | −0.044          | 0.389                              | 0.023      | 1.206                        | 0.089              | 0.426                      | −0.014          | 0.157                              | 0.036      | 0.928                         |
| 3a      | NMe <sub>2</sub> CH <sub>2</sub>                  | 2-NC <sub>5</sub> H <sub>4</sub> | 0.086              | 0.380                      | −0.014          | 0.163                              | 0.039      | 0.903                        | 0.102              | 0.478                      | −0.020          | 0.196                              | 0.023      | 1.004                         |
| 3b      | NEt <sub>2</sub> CH <sub>2</sub>                  | 2-NC <sub>5</sub> H <sub>4</sub> | 0.085              | 0.373                      | −0.014          | 0.165                              | 0.041      | 0.900                        | 0.102              | 0.476                      | −0.020          | 0.196                              | 0.018      | 1.000                         |
| 3c      | N(C <sub>4</sub> H <sub>8</sub> O)CH <sub>2</sub> | 2-NC <sub>5</sub> H <sub>4</sub> | 0.084              | 0.372                      | −0.013          | 0.155                              | 0.038      | 0.896                        | 0.102              | 0.477                      | −0.020          | 0.196                              | 0.021      | 1.004                         |

\* Taken from reference [36].

**S2. Cartesian Coordinates****Compound I**

|                                                                   |             |             |             |
|-------------------------------------------------------------------|-------------|-------------|-------------|
| C                                                                 | -2.05277800 | -1.54143900 | 0.03010600  |
| C                                                                 | -3.44312100 | -1.40137100 | -0.12997700 |
| C                                                                 | -4.01170500 | -0.14901600 | -0.41113400 |
| C                                                                 | -3.18958500 | 0.98297400  | -0.53091800 |
| C                                                                 | -1.79779600 | 0.85873700  | -0.38395800 |
| C                                                                 | -1.23349400 | -0.40473400 | -0.08377000 |
| H                                                                 | -1.61561800 | -2.51695700 | 0.25012000  |
| H                                                                 | -4.08159800 | -2.28529300 | -0.03124200 |
| H                                                                 | -5.09444300 | -0.05156500 | -0.53513400 |
| H                                                                 | -3.62877700 | 1.96432100  | -0.74355800 |
| C                                                                 | -0.84574000 | 2.00946700  | -0.54827000 |
| H                                                                 | -0.46602800 | 2.05047900  | -1.58488800 |
| H                                                                 | -1.31158300 | 2.98873500  | -0.31802500 |
| N                                                                 | 0.34606100  | 1.78948400  | 0.33320400  |
| C                                                                 | 1.44135600  | 2.71642000  | -0.04795400 |
| H                                                                 | 1.09654500  | 3.76152900  | 0.07308400  |
| H                                                                 | 2.31276900  | 2.53725400  | 0.59654600  |
| H                                                                 | 1.74138400  | 2.52945100  | -1.08680500 |
| C                                                                 | -0.00674700 | 2.01398800  | 1.76456700  |
| H                                                                 | 0.85686800  | 1.75365500  | 2.39356400  |
| H                                                                 | -0.26653500 | 3.07877000  | 1.92578800  |
| H                                                                 | -0.86115800 | 1.38213300  | 2.04200600  |
| Pd                                                                | 0.75965900  | -0.34104100 | 0.16291200  |
| Cl                                                                | 1.05225400  | -2.59427500 | 0.40993300  |
| Cl                                                                | 2.75887100  | -0.02579400 | -1.04287300 |
| Optimization using PBE/6-31+G(d,p)[SDD]                           |             |             |             |
| Energy = -1452.3633527 a.u.                                       |             |             |             |
| Zero-point energy correction = 0.190005 a.u.                      |             |             |             |
| Single point energy using $\omega$ B97XD/6-311++G(2df,2p)[DGDZVP] |             |             |             |
| Energy = -6265.1681887 a.u.                                       |             |             |             |

**Compound II**

|   |             |             |             |
|---|-------------|-------------|-------------|
| C | -1.75470500 | -1.71701100 | 0.18204900  |
| C | -3.15092500 | -1.82196100 | 0.05737800  |
| C | -3.91682000 | -0.72315900 | -0.35894300 |
| C | -3.28445100 | 0.49510700  | -0.65156000 |
| C | -1.88662000 | 0.61599200  | -0.54596300 |
| C | -1.11556400 | -0.49383300 | -0.10252200 |
| H | -1.16827500 | -2.57723400 | 0.50824000  |
| H | -3.63522300 | -2.77567400 | 0.29082600  |
| H | -5.00324300 | -0.81060600 | -0.45486400 |
| H | -3.87799300 | 1.35963000  | -0.96994700 |
| C | -1.18752200 | 1.90301400  | -0.88227700 |
| H | -0.77335000 | 1.90147400  | -1.90597900 |
| H | -1.82538400 | 2.79563800  | -0.77027000 |
| S | 0.30833800  | 2.07653600  | 0.18715900  |
| C | -0.47697500 | 2.31280000  | 1.82458100  |

|                                                           |             |             |             |
|-----------------------------------------------------------|-------------|-------------|-------------|
| H                                                         | 0.31847100  | 2.21720400  | 2.57725800  |
| H                                                         | −0.90261100 | 3.32735700  | 1.86687100  |
| H                                                         | −1.25088800 | 1.55170100  | 1.99782600  |
| Pd                                                        | 0.87783500  | −0.20541400 | 0.13389000  |
| Cl                                                        | 1.43368200  | −2.41937900 | 0.37313900  |
| Cl                                                        | 2.88668100  | 0.40816000  | −0.92784000 |
| Optimization using PBE/6-31+G(d,p)[SDD]                   |             |             |             |
| Energy = −1755.8262745 a.u.                               |             |             |             |
| Zero-point energy correction = 0.145848 a.u.              |             |             |             |
| Single point energy using ωB97XD/6-311++G(2df,2p)[DGDZVP] |             |             |             |
| Energy = −6568.7076067 a.u.                               |             |             |             |

## Compound III

|                                                           |             |             |             |
|-----------------------------------------------------------|-------------|-------------|-------------|
| C                                                         | −2.20330800 | −1.41797200 | 0.11668300  |
| C                                                         | −3.59168600 | −1.24546300 | −0.00502600 |
| C                                                         | −4.12934100 | 0.00212200  | −0.35561200 |
| C                                                         | −3.27181100 | 1.08827700  | −0.58283500 |
| C                                                         | −1.87661400 | 0.93522400  | −0.47251000 |
| C                                                         | −1.33313900 | −0.32634100 | −0.09975200 |
| H                                                         | −1.79811200 | −2.39289600 | 0.39057800  |
| H                                                         | −4.25144800 | −2.09973200 | 0.17853300  |
| H                                                         | −5.21165600 | 0.13104400  | −0.45326800 |
| H                                                         | −3.68497300 | 2.06634100  | −0.85398400 |
| C                                                         | −0.93900100 | 2.09200500  | −0.73130400 |
| H                                                         | −0.62689300 | 2.12887300  | −1.79219000 |
| H                                                         | −1.37663500 | 3.07246100  | −0.47403300 |
| P                                                         | 0.56938100  | 1.70607400  | 0.25933300  |
| C                                                         | 1.92978300  | 2.77298900  | −0.34840000 |
| H                                                         | 1.63230000  | 3.83287300  | −0.28059700 |
| H                                                         | 2.83283200  | 2.59803600  | 0.25512800  |
| H                                                         | 2.16539100  | 2.50580200  | −1.38870600 |
| C                                                         | 0.22003000  | 2.28836400  | 1.96975300  |
| H                                                         | 1.05277300  | 2.00529100  | 2.63160600  |
| H                                                         | 0.09436800  | 3.38383600  | 1.98777400  |
| H                                                         | −0.69771100 | 1.80177400  | 2.33272100  |
| Pd                                                        | 0.69326500  | −0.56365500 | 0.11533000  |
| Cl                                                        | 0.74103700  | −2.87769000 | 0.37918100  |
| Cl                                                        | 2.82422100  | −0.40653900 | −0.88945800 |
| Optimization using PBE/6-31+G(d,p)[SDD]                   |             |             |             |
| Energy = −1738.8896856 a.u.                               |             |             |             |
| Zero-point energy correction = 0.182235 a.u.              |             |             |             |
| Single point energy using ωB97XD/6-311++G(2df,2p)[DGDZVP] |             |             |             |
| Energy = −6551.81864 a.u.                                 |             |             |             |

## Compound IV

|    |             |             |             |
|----|-------------|-------------|-------------|
| Pd | 0.70174700  | 0.01412000  | −0.15268100 |
| C  | −1.25872000 | −0.06521300 | −0.09074700 |
| C  | −1.97075900 | −1.27816300 | 0.04730000  |
| C  | −3.37823200 | −1.24924300 | 0.10831400  |
| C  | −4.05918900 | −0.02056700 | 0.07031000  |

|                                                           |             |             |             |
|-----------------------------------------------------------|-------------|-------------|-------------|
| C                                                         | −3.34926600 | 1.18937100  | −0.04591500 |
| C                                                         | −1.94839300 | 1.16689100  | −0.14265000 |
| C                                                         | −1.16691100 | −2.54804900 | 0.17039600  |
| C                                                         | −1.08004000 | 2.37722100  | −0.38174000 |
| C                                                         | 1.29423700  | 2.98745900  | −0.59991500 |
| Cl                                                        | 3.10559300  | 0.14529300  | −0.00477300 |
| H                                                         | −5.15145900 | −0.00514000 | 0.13277700  |
| H                                                         | −3.89419900 | 2.14020400  | −0.07344800 |
| H                                                         | −3.94669000 | −2.18206400 | 0.19855800  |
| H                                                         | −1.60860400 | −3.40325300 | −0.36837000 |
| H                                                         | −1.02781100 | −2.83832900 | 1.22704000  |
| H                                                         | −0.99928900 | 2.56338600  | −1.46766500 |
| H                                                         | −1.47601000 | 3.30327100  | 0.08275600  |
| H                                                         | 1.06343800  | 4.05572500  | −0.41432800 |
| H                                                         | 2.30669000  | 2.74498300  | −0.24668500 |
| H                                                         | 1.24419100  | 2.77847900  | −1.67831500 |
| C                                                         | 0.40946100  | 2.37934500  | 1.57648900  |
| H                                                         | 1.41030100  | 2.08959000  | 1.92816900  |
| H                                                         | 0.23644400  | 3.45522200  | 1.78376000  |
| H                                                         | −0.34895000 | 1.77852100  | 2.09828200  |
| N                                                         | 0.32243200  | 2.12025700  | 0.11279900  |
| S                                                         | 0.54889100  | −2.23699600 | −0.51352800 |
| C                                                         | 1.60636800  | −3.09241100 | 0.70916300  |
| H                                                         | 1.52359000  | −4.18102300 | 0.56940800  |
| H                                                         | 2.63079300  | −2.74888000 | 0.50064300  |
| H                                                         | 1.33153200  | −2.79989500 | 1.73270000  |
| Optimization using PBE/6-31+G(d,p)[SDD]                   |             |             |             |
| Energy = −1468.9266824 a.u.                               |             |             |             |
| Zero-point energy correction = 0.244944 a.u.              |             |             |             |
| Single point energy using ωB97XD/6-311++G(2df,2p)[DGDZVP] |             |             |             |
| Energy = −6281.8376981 a.u.                               |             |             |             |

## Compound V

|    |             |             |             |
|----|-------------|-------------|-------------|
| Pd | −0.61788300 | −0.34361900 | −0.12767500 |
| C  | −2.43610900 | 2.56072100  | −0.91175400 |
| C  | 1.28604900  | 0.29950400  | −0.06492700 |
| C  | 1.62302900  | 1.67759500  | −0.17625400 |
| C  | 2.97011600  | 2.08396500  | −0.12650500 |
| C  | 3.99513200  | 1.13442300  | 0.00446000  |
| C  | 3.67832800  | −0.22897500 | 0.10237000  |
| C  | 2.33453100  | −0.64861000 | 0.08834000  |
| C  | 0.50324200  | 2.68049000  | −0.38168800 |
| C  | 1.98925000  | −2.10382200 | 0.29894300  |
| Cl | −2.90254700 | −1.08291300 | −0.07428200 |
| H  | 5.04073800  | 1.45639300  | 0.02741200  |
| H  | 4.48108800  | −0.96854900 | 0.20340100  |
| H  | 3.22240100  | 3.14790600  | −0.20398700 |
| H  | 0.41008700  | 2.94810700  | −1.45166200 |
| H  | 0.65641400  | 3.62262200  | 0.17510900  |
| H  | 2.75433800  | −2.78601500 | −0.10746000 |

|                                                           |             |             |             |
|-----------------------------------------------------------|-------------|-------------|-------------|
| H                                                         | 1.86090600  | −2.32810000 | 1.37323700  |
| H                                                         | −3.36965800 | 2.03386700  | −0.65902700 |
| H                                                         | −2.54541100 | 3.64214300  | −0.72478800 |
| H                                                         | −2.22445400 | 2.38457800  | −1.97727000 |
| C                                                         | −1.45870600 | 2.38711500  | 1.81950100  |
| H                                                         | −1.61156800 | 3.47882200  | 1.86104100  |
| H                                                         | −2.36713400 | 1.87050700  | 2.16622600  |
| H                                                         | −0.62223500 | 2.10461600  | 2.47644300  |
| P                                                         | −1.08612100 | 1.83514500  | 0.10230700  |
| S                                                         | 0.35327900  | −2.46556700 | −0.50353400 |
| C                                                         | −0.40833400 | −3.65096100 | 0.65952400  |
| H                                                         | −1.47641300 | −3.67736300 | 0.39484200  |
| H                                                         | 0.04620200  | −4.64549500 | 0.53692400  |
| H                                                         | −0.30916600 | −3.29482100 | 1.69533200  |
| Optimization using PBE/6-31+G(d,p)[SDD]                   |             |             |             |
| Energy = −1755.4562478 a.u.                               |             |             |             |
| Zero-point energy correction = 0.237261 a.u.              |             |             |             |
| Single point energy using ωB97XD/6-311++G(2df,2p)[DGDZVP] |             |             |             |
| Energy = −6568.491708 a.u.                                |             |             |             |

## Compound VI

|    |             |             |             |
|----|-------------|-------------|-------------|
| Pd | 0.55265100  | 0.42163900  | −0.03944700 |
| P  | 1.36061000  | −1.64786800 | −0.02686500 |
| C  | 2.01157200  | −2.26360300 | −1.63771200 |
| C  | −1.19716000 | −0.50964000 | −0.04261200 |
| C  | −1.35940100 | −1.90159200 | 0.17071600  |
| C  | −2.65681600 | −2.45108100 | 0.20115600  |
| C  | −3.78144500 | −1.62492000 | 0.04118100  |
| C  | −3.62469600 | −0.24210500 | −0.16375200 |
| C  | −2.33595100 | 0.31423500  | −0.21851100 |
| C  | −0.10942100 | −2.73341600 | 0.38895700  |
| C  | −2.06621200 | 1.76476300  | −0.54485800 |
| N  | −0.74405300 | 2.20157000  | 0.01904400  |
| C  | −0.88173700 | 2.54980400  | 1.45698000  |
| C  | −0.20963700 | 3.36699600  | −0.72341800 |
| C  | 2.69067900  | −2.06113600 | 1.17455900  |
| Cl | 2.65869700  | 1.58009400  | 0.04971100  |
| H  | −4.78516600 | −2.05950200 | 0.07843100  |
| H  | −4.50859400 | 0.39437600  | −0.28964500 |
| H  | −2.79383000 | −3.52703600 | 0.36069400  |
| H  | −0.09828000 | −3.66433700 | −0.20735300 |
| H  | −0.01066800 | −3.03317700 | 1.44977200  |
| H  | −1.99335900 | 1.88341300  | −1.64119500 |
| H  | −2.87208100 | 2.44330300  | −0.19525900 |
| H  | 0.11548800  | 2.76640500  | 1.86761100  |
| H  | −1.53512500 | 3.43892100  | 1.57787600  |
| H  | −1.31881200 | 1.69863500  | 1.99882000  |
| H  | −0.88991900 | 4.23786800  | −0.62770900 |
| H  | 0.78529400  | 3.61437300  | −0.32480200 |
| H  | −0.09722400 | 3.10276700  | −1.78526900 |

|                                                           |            |             |             |
|-----------------------------------------------------------|------------|-------------|-------------|
| H                                                         | 3.55385900 | −1.41061000 | 0.96351900  |
| H                                                         | 2.33994700 | −1.84120700 | 2.19426600  |
| H                                                         | 2.98455500 | −3.12168300 | 1.10072200  |
| H                                                         | 2.85428500 | −1.62387800 | −1.94266400 |
| H                                                         | 2.34952600 | −3.31047200 | −1.55538300 |
| H                                                         | 1.22089400 | −2.18796600 | −2.39940800 |
| Optimization using PBE/6-31+G(d,p)[SDD]                   |            |             |             |
| Energy = −1451.9901878 a.u.                               |            |             |             |
| Zero-point energy correction = 0.281139 a.u.              |            |             |             |
| Single point energy using ωB97XD/6-311++G(2df,2p)[DGDZVP] |            |             |             |
| Energy = −6264.9477105 a.u.                               |            |             |             |

## Compound 1a

|                                                           |             |             |             |
|-----------------------------------------------------------|-------------|-------------|-------------|
| Pd                                                        | 0.46035700  | −0.69569800 | −0.09378100 |
| C                                                         | −2.37511500 | −1.81277600 | 0.05789200  |
| H                                                         | −1.81864600 | −2.75644100 | 0.04172000  |
| C                                                         | −3.77207000 | −1.74454300 | 0.10521600  |
| H                                                         | −4.35782400 | −2.66653500 | 0.12955400  |
| C                                                         | −4.38481700 | −0.48205100 | 0.11839600  |
| H                                                         | −5.47486600 | −0.39348000 | 0.15372600  |
| C                                                         | −3.58883300 | 0.66814800  | 0.08565900  |
| H                                                         | −4.04571700 | 1.66090900  | 0.09498000  |
| C                                                         | −2.18806400 | 0.54866500  | 0.03969600  |
| C                                                         | −1.21794900 | 1.64945200  | 0.01185800  |
| C                                                         | −1.52584300 | 3.02507200  | 0.02851900  |
| H                                                         | −2.56565300 | 3.36867200  | 0.05248200  |
| C                                                         | −0.48893700 | 3.96974600  | 0.01046000  |
| H                                                         | −0.72742600 | 5.03729000  | 0.01170600  |
| C                                                         | 0.85711500  | 3.55812500  | −0.00329700 |
| H                                                         | 1.65221300  | 4.31263600  | −0.00814100 |
| C                                                         | 1.18065000  | 2.18716500  | −0.00068500 |
| C                                                         | 0.13993400  | 1.23318800  | −0.01805800 |
| C                                                         | 2.59998300  | 1.68097800  | 0.07626400  |
| H                                                         | 2.97961400  | 1.70868900  | 1.11309500  |
| H                                                         | 3.30151400  | 2.24475400  | −0.56125500 |
| C                                                         | 3.66443900  | −0.88143300 | 0.85645800  |
| H                                                         | 4.71818500  | −0.59479000 | 0.71975900  |
| H                                                         | 3.53757100  | −1.96635900 | 0.72250200  |
| H                                                         | 3.29825500  | −0.59438300 | 1.85241100  |
| Cl                                                        | 0.81729700  | −3.07067500 | −0.06705000 |
| N                                                         | −1.61039300 | −0.70206000 | 0.02720300  |
| S                                                         | 2.64388100  | −0.11508500 | −0.45434000 |
| Optimization using PBE/6-31+G(d,p)[SDD]                   |             |             |             |
| Energy = −1542.6834107 a.u.                               |             |             |             |
| Zero-point energy correction = 0.213060 a.u.              |             |             |             |
| Single point energy using ωB97XD/6-311++G(2df,2p)[DGDZVP] |             |             |             |
| Energy = −6355.6377844 a.u.                               |             |             |             |

Compound **1b**

|                                                           |             |             |             |
|-----------------------------------------------------------|-------------|-------------|-------------|
| Pd                                                        | 0.36667100  | −0.61998600 | −0.23173000 |
| C                                                         | −2.34270200 | −1.99639700 | 0.07415700  |
| H                                                         | −1.70737800 | −2.88574800 | −0.00313900 |
| C                                                         | −3.73404200 | −2.05720800 | 0.21145800  |
| H                                                         | −4.23176800 | −3.02927400 | 0.24597800  |
| C                                                         | −4.45552000 | −0.85674100 | 0.29987200  |
| H                                                         | −5.54448200 | −0.86908400 | 0.40621000  |
| C                                                         | −3.76949600 | 0.36163400  | 0.25049600  |
| H                                                         | −4.31188300 | 1.30807900  | 0.31748600  |
| C                                                         | −2.36948500 | 0.37144100  | 0.11183300  |
| C                                                         | −1.50697400 | 1.55726900  | 0.05124500  |
| C                                                         | −1.93719600 | 2.89739800  | 0.13097500  |
| H                                                         | −2.99956900 | 3.14126200  | 0.23872900  |
| C                                                         | −0.99464900 | 3.93448900  | 0.06935200  |
| H                                                         | −1.32833600 | 4.97498100  | 0.12047300  |
| C                                                         | 0.37848100  | 3.64980200  | −0.05250400 |
| H                                                         | 1.09884400  | 4.47510300  | −0.09200800 |
| C                                                         | 0.82554600  | 2.31541200  | −0.11465100 |
| C                                                         | −0.12221600 | 1.26942200  | −0.08538800 |
| C                                                         | 2.28712200  | 1.94498500  | −0.16537700 |
| H                                                         | 2.74781000  | 2.00220100  | 0.83630200  |
| H                                                         | 2.87441300  | 2.57938000  | −0.85016200 |
| C                                                         | 3.69321500  | −0.53028000 | 0.43351300  |
| H                                                         | 4.61478800  | 0.06209700  | 0.29624600  |
| H                                                         | 3.86484900  | −1.53649000 | 0.01705000  |
| Cl                                                        | 0.93527400  | −2.95550600 | −0.27198000 |
| N                                                         | −1.68382300 | −0.82030900 | 0.02642000  |
| S                                                         | 2.45361600  | 0.17239900  | −0.74142000 |
| C                                                         | 3.25340700  | −0.61634100 | 1.89081100  |
| H                                                         | 2.36606800  | −1.26251900 | 1.98101000  |
| H                                                         | 4.06914300  | −1.05413000 | 2.49208800  |
| H                                                         | 3.01694700  | 0.37156900  | 2.31998100  |
| Optimization using PBE/6-31+G(d,p)[SDD]                   |             |             |             |
| Energy = −1581.944827 a.u.                                |             |             |             |
| Zero-point energy correction = 0.240616 a.u.              |             |             |             |
| Single point energy using ωB97XD/6-311++G(2df,2p)[DGDZVP] |             |             |             |
| Energy = −6394.9562865 a.u.                               |             |             |             |

Compound **1c**

|    |             |             |             |
|----|-------------|-------------|-------------|
| Pd | 0.20652300  | −0.52775500 | −0.40644400 |
| C  | −2.27898900 | −2.21860000 | 0.12925800  |
| H  | −1.55890100 | −3.02307100 | −0.05771900 |
| C  | −3.62997200 | −2.44550000 | 0.41529400  |
| H  | −4.00881700 | −3.46939300 | 0.45930400  |
| C  | −4.46616800 | −1.34048800 | 0.63710200  |
| H  | −5.52769700 | −1.48287400 | 0.86116300  |
| C  | −3.93110900 | −0.04947500 | 0.56912200  |
| H  | −4.56537100 | 0.82426500  | 0.73866100  |
| C  | −2.56600000 | 0.12784100  | 0.27909500  |



|                                                           |             |             |             |
|-----------------------------------------------------------|-------------|-------------|-------------|
| C                                                         | −1.85311500 | 1.40682400  | 0.18092400  |
| C                                                         | −2.41780800 | 2.68433200  | 0.37108800  |
| H                                                         | −3.48145500 | 2.79962100  | 0.60591500  |
| C                                                         | −1.60984500 | 3.82535900  | 0.25650400  |
| H                                                         | −2.04909900 | 4.81762800  | 0.39456900  |
| C                                                         | −0.23689400 | 3.70612100  | −0.02960100 |
| H                                                         | 0.37801200  | 4.61016100  | −0.10845900 |
| C                                                         | 0.34590500  | 2.43561600  | −0.20467500 |
| C                                                         | −0.46938300 | 1.28617700  | −0.12001900 |
| C                                                         | 1.82378200  | 2.24260100  | −0.43929900 |
| H                                                         | 2.39645600  | 2.34610400  | 0.49884800  |
| H                                                         | 2.24206000  | 2.95082800  | −1.17422000 |
| C                                                         | 3.53900800  | −0.07121500 | −0.03758700 |
| H                                                         | 4.36763500  | 0.64002700  | −0.20827400 |
| H                                                         | 3.80763600  | −1.03033100 | −0.51251400 |
| Cl                                                        | 1.01577400  | −2.78245000 | −0.62114800 |
| N                                                         | −1.76636000 | −0.97281100 | 0.06332100  |
| S                                                         | 2.13324700  | 0.51140600  | −1.08151700 |
| C                                                         | 3.23708900  | −0.27509600 | 1.44751100  |
| H                                                         | 2.41635700  | −1.00851700 | 1.53134000  |
| H                                                         | 2.87509900  | 0.66643200  | 1.89980500  |
| C                                                         | 4.47748200  | −0.76989000 | 2.20659000  |
| H                                                         | 4.24408500  | −0.92511700 | 3.27258200  |
| H                                                         | 4.83491300  | −1.73146100 | 1.80069000  |
| H                                                         | 5.30955600  | −0.04639500 | 2.14742400  |
| Optimization using PBE/6-31+G(d,p)[SDD]                   |             |             |             |
| Energy = −1621.2043503 a.u.                               |             |             |             |
| Zero-point energy correction = 0.268431 a.u.              |             |             |             |
| Single point energy using ωB97XD/6-311++G(2df,2p)[DGDZVP] |             |             |             |
| Energy = −6434.27147 a.u.                                 |             |             |             |

## Compound 1d

|    |             |             |             |
|----|-------------|-------------|-------------|
| Pd | −0.27180500 | −0.51370000 | −0.33108200 |
| C  | −2.75851800 | −2.23208600 | 0.10782400  |
| H  | −2.02479700 | −3.02629000 | −0.07070700 |
| C  | −4.11492200 | −2.47538100 | 0.35129300  |
| H  | −4.48334400 | −3.50380300 | 0.37183300  |
| C  | −4.96938900 | −1.38228500 | 0.56073800  |
| H  | −6.03551600 | −1.53790700 | 0.75170600  |
| C  | −4.44551000 | −0.08566600 | 0.52347700  |
| H  | −5.09271900 | 0.78009300  | 0.68451900  |
| C  | −3.07409300 | 0.10834100  | 0.27774900  |
| C  | −2.37216700 | 1.39437500  | 0.22137200  |
| C  | −2.95994100 | 2.66362500  | 0.39841300  |
| H  | −4.03411300 | 2.76326400  | 0.58773500  |
| C  | −2.16327900 | 3.81557600  | 0.32687400  |
| H  | −2.62085600 | 4.80117300  | 0.45243000  |
| C  | −0.77811500 | 3.71498300  | 0.09992500  |
| H  | −0.16966300 | 4.62550300  | 0.05595800  |
| C  | −0.17430100 | 2.45218500  | −0.05758000 |

|                                                           |             |             |             |
|-----------------------------------------------------------|-------------|-------------|-------------|
| C                                                         | −0.97620700 | 1.29192900  | −0.02069500 |
| C                                                         | 1.31227700  | 2.27188300  | −0.20458800 |
| H                                                         | 1.81765100  | 2.25028600  | 0.77577900  |
| H                                                         | 1.79116800  | 3.04231100  | −0.83100300 |
| Cl                                                        | 0.46827600  | −2.78018300 | −0.62314200 |
| N                                                         | −2.25632600 | −0.98058300 | 0.07285800  |
| S                                                         | 1.63971800  | 0.59144800  | −0.98410600 |
| C                                                         | 3.14412500  | 0.10388800  | −0.10754600 |
| C                                                         | 4.34823400  | 0.73515100  | −0.47333400 |
| C                                                         | 3.12353800  | −0.89584700 | 0.87829500  |
| C                                                         | 5.53707100  | 0.38459400  | 0.18393900  |
| H                                                         | 4.35868500  | 1.48608000  | −1.26983400 |
| C                                                         | 4.32333900  | −1.24796300 | 1.51670700  |
| H                                                         | 2.18634800  | −1.41051400 | 1.10984200  |
| C                                                         | 5.52538000  | −0.60623600 | 1.17944000  |
| H                                                         | 6.47398800  | 0.87679400  | −0.09440000 |
| H                                                         | 4.31318500  | −2.03336700 | 2.27846100  |
| H                                                         | 6.45599200  | −0.88578000 | 1.68273500  |
| Optimization using PBE/6-31+G(d,p)[SDD]                   |             |             |             |
| Energy = −1734.1834206 a.u.                               |             |             |             |
| Zero-point energy correction = 0.264283 a.u.              |             |             |             |
| Single point energy using ωB97XD/6-311++G(2df,2p)[DGDZVP] |             |             |             |
| Energy = −6547.3573409 a.u.                               |             |             |             |

## Compound 1e

|    |             |             |             |
|----|-------------|-------------|-------------|
| Pd | −0.52519100 | −0.48257200 | −0.38692800 |
| C  | −2.89245600 | −2.33997700 | 0.13325300  |
| H  | −2.12921600 | −3.08960200 | −0.10474300 |
| C  | −4.22024000 | −2.66059700 | 0.43735300  |
| H  | −4.53406600 | −3.70715300 | 0.44695800  |
| C  | −5.11776300 | −1.61968900 | 0.72047300  |
| H  | −6.16328400 | −1.83604700 | 0.96014200  |
| C  | −4.66381400 | −0.29667600 | 0.69332700  |
| H  | −5.34533100 | 0.52978700  | 0.90981200  |
| C  | −3.31861700 | −0.02445300 | 0.38443600  |
| C  | −2.68808900 | 1.29808000  | 0.32544200  |
| C  | −3.32957400 | 2.52982900  | 0.56897200  |
| H  | −4.39482400 | 2.56783600  | 0.82082800  |
| C  | −2.59819600 | 3.72344300  | 0.48423600  |
| H  | −3.09768600 | 4.68041900  | 0.66111600  |
| C  | −1.22456000 | 3.70152400  | 0.17860900  |
| H  | −0.66743900 | 4.64390800  | 0.12544500  |
| C  | −0.56593800 | 2.47667900  | −0.04541800 |
| C  | −1.30450300 | 1.27528200  | 0.00455100  |
| C  | 0.91727500  | 2.37703300  | −0.27882900 |
| H  | 1.47760100  | 2.35788300  | 0.67129800  |
| H  | 1.32215600  | 3.18530600  | −0.90996200 |
| Cl | 0.32804500  | −2.69424100 | −0.76330200 |
| N  | −2.45749800 | −1.06333500 | 0.10901200  |
| S  | 1.28653200  | 0.73411100  | −1.11903500 |

|                                                           |            |             |             |
|-----------------------------------------------------------|------------|-------------|-------------|
| C                                                         | 2.85050900 | 0.29132300  | −0.33622600 |
| C                                                         | 4.02843600 | 0.87569000  | −0.83493300 |
| C                                                         | 2.90861300 | −0.62866100 | 0.72372500  |
| C                                                         | 5.26086400 | 0.55899000  | −0.24586200 |
| H                                                         | 3.98546000 | 1.56890100  | −1.68112600 |
| C                                                         | 4.15068300 | −0.94213400 | 1.29143800  |
| H                                                         | 1.99220200 | −1.11382200 | 1.07213200  |
| C                                                         | 5.34445500 | −0.35559900 | 0.82324400  |
| H                                                         | 6.17474500 | 1.02204000  | −0.63393800 |
| H                                                         | 4.19099700 | −1.66587000 | 2.11282800  |
| C                                                         | 6.67851700 | −0.72944200 | 1.42558000  |
| H                                                         | 7.05531900 | −1.67271000 | 0.99057200  |
| H                                                         | 7.43873400 | 0.04602300  | 1.24032700  |
| H                                                         | 6.60101200 | −0.88277900 | 2.51438500  |
| Optimization using PBE/6-31+G(d,p)[SDD]                   |            |             |             |
| Energy = −1773.4473545 a.u.                               |            |             |             |
| Zero-point energy correction = 0.290848 a.u.              |            |             |             |
| Single point energy using ωB97XD/6-311++G(2df,2p)[DGDZVP] |            |             |             |
| Energy = −6586.6757952 a.u.                               |            |             |             |

## Compound 1f

|    |             |             |             |
|----|-------------|-------------|-------------|
| Pd | −0.75088400 | −0.43324100 | −0.44558100 |
| C  | −2.97501700 | −2.46002900 | 0.07874100  |
| H  | −2.18183100 | −3.14786900 | −0.23560000 |
| C  | −4.26517500 | −2.87795900 | 0.42412100  |
| H  | −4.51563200 | −3.94092600 | 0.38906500  |
| C  | −5.20775500 | −1.91118900 | 0.80626600  |
| H  | −6.22554400 | −2.20419800 | 1.08125700  |
| C  | −4.83511800 | −0.56308900 | 0.83184200  |
| H  | −5.55329300 | 0.20690600  | 1.12464500  |
| C  | −3.52547500 | −0.19179000 | 0.47680500  |
| C  | −2.97999600 | 1.16917600  | 0.45850800  |
| C  | −3.68224100 | 2.34449200  | 0.79556100  |
| H  | −4.73422400 | 2.30332700  | 1.09787800  |
| C  | −3.03004300 | 3.58467600  | 0.73903400  |
| H  | −3.57766100 | 4.49822000  | 0.98836200  |
| C  | −1.67428500 | 3.66476700  | 0.36934600  |
| H  | −1.17877800 | 4.64194200  | 0.33921900  |
| C  | −0.95412400 | 2.49654800  | 0.05198300  |
| C  | −1.61558500 | 1.25005900  | 0.07183000  |
| C  | 0.51944300  | 2.50049700  | −0.25336900 |
| H  | 1.12504600  | 2.46077000  | 0.66783900  |
| H  | 0.84638600  | 3.36613200  | −0.85288800 |
| Cl | 0.22426800  | −2.56517300 | −0.95926300 |
| N  | −2.61772900 | −1.15945200 | 0.10678000  |
| S  | 0.94237500  | 0.93162700  | −1.20421700 |
| C  | 2.56351700  | 0.52941200  | −0.53753600 |
| C  | 3.69666800  | 1.13070700  | −1.12468100 |
| C  | 2.72042400  | −0.38780600 | 0.51204600  |
| C  | 4.97230100  | 0.83928000  | −0.63980600 |

|                                                           |            |             |             |
|-----------------------------------------------------------|------------|-------------|-------------|
| H                                                         | 3.57982200 | 1.81929700  | −1.96733200 |
| C                                                         | 4.00120000 | −0.69315900 | 0.99606500  |
| H                                                         | 1.84188100 | −0.89238100 | 0.92457200  |
| C                                                         | 5.13161100 | −0.07510200 | 0.42448300  |
| H                                                         | 5.86311100 | 1.29427200  | −1.08119600 |
| H                                                         | 4.10056800 | −1.42193700 | 1.80283300  |
| O                                                         | 6.42168600 | −0.30062000 | 0.81775000  |
| C                                                         | 6.64536800 | −1.24588500 | 1.86818100  |
| H                                                         | 7.73436500 | −1.27798700 | 2.00884800  |
| H                                                         | 6.16229000 | −0.92423400 | 2.80916700  |
| H                                                         | 6.27989500 | −2.25087600 | 1.58902900  |
| Optimization using PBE/6-31+G(d,p)[SDD]                   |            |             |             |
| Energy = −1848.585334 a.u.                                |            |             |             |
| Zero-point energy correction = 0.296003 a.u.              |            |             |             |
| Single point energy using ωB97XD/6-311++G(2df,2p)[DGDZVP] |            |             |             |
| Energy = −6661.8862933 a.u.                               |            |             |             |

## Compound 2a

|    |             |             |             |
|----|-------------|-------------|-------------|
| Pd | −0.78268800 | −0.62530300 | −0.05774600 |
| Cl | −0.28046200 | −2.95797500 | −0.29195900 |
| P  | 1.23595600  | 0.29211800  | 0.03860900  |
| O  | 0.98890400  | 1.97107000  | 0.22325100  |
| N  | −2.90373900 | −0.80291300 | −0.08406800 |
| C  | −0.36279500 | 2.29912700  | 0.24996100  |
| C  | −0.76456400 | 3.63435100  | 0.38763400  |
| H  | −0.01893000 | 4.42953400  | 0.47577100  |
| C  | −2.14403500 | 3.92319300  | 0.40932900  |
| H  | −2.46735200 | 4.96272100  | 0.51590900  |
| C  | −3.10439500 | 2.90749700  | 0.29826700  |
| H  | −4.16748500 | 3.16698800  | 0.31989900  |
| C  | −2.68748900 | 1.56391500  | 0.16097700  |
| C  | −1.30528800 | 1.26303800  | 0.13659800  |
| C  | −3.56945200 | 0.39498800  | 0.03689300  |
| C  | −4.97670900 | 0.41458100  | 0.03498500  |
| H  | −5.50477600 | 1.36641600  | 0.13174100  |
| C  | −5.68801200 | −0.78387700 | −0.08945900 |
| H  | −6.78226300 | −0.77366600 | −0.09105400 |
| C  | −4.98672500 | −1.99323200 | −0.21130500 |
| H  | −5.50541100 | −2.94978300 | −0.31065200 |
| C  | −3.58729800 | −1.95742400 | −0.20419300 |
| H  | −2.96668300 | −2.85626500 | −0.29498900 |
| C  | 2.30143000  | 0.23141000  | −1.44730300 |
| C  | 3.01687300  | 1.36193900  | −1.89063200 |
| H  | 2.91173100  | 2.31635900  | −1.36682500 |
| C  | 3.84509700  | 1.25921900  | −3.01808400 |
| H  | 4.39574400  | 2.13835400  | −3.36738000 |
| C  | 3.96364500  | 0.03596200  | −3.69839100 |
| H  | 4.61013600  | −0.03904700 | −4.57843600 |
| C  | 3.24434100  | −1.08683400 | −3.25741900 |
| H  | 3.32400300  | −2.03716900 | −3.79406900 |

|                                                           |            |             |             |
|-----------------------------------------------------------|------------|-------------|-------------|
| C                                                         | 2.40652200 | −0.99465600 | −2.13607600 |
| H                                                         | 1.82181900 | −1.86098300 | −1.80332200 |
| C                                                         | 2.32535200 | −0.09326400 | 1.45613300  |
| C                                                         | 3.23795100 | 0.85859600  | 1.95629400  |
| H                                                         | 3.28116100 | 1.86127600  | 1.52081200  |
| C                                                         | 4.07580800 | 0.51879200  | 3.02737700  |
| H                                                         | 4.77845100 | 1.25933700  | 3.42221200  |
| C                                                         | 4.01347500 | −0.76677000 | 3.59245000  |
| H                                                         | 4.67078500 | −1.02768100 | 4.42788400  |
| C                                                         | 3.10577200 | −1.71263300 | 3.09099500  |
| H                                                         | 3.05065300 | −2.71193600 | 3.53350600  |
| C                                                         | 2.25389900 | −1.38028800 | 2.02601200  |
| H                                                         | 1.53508900 | −2.11068400 | 1.63569600  |
| Optimization using PBE/6-31+G(d,p)[SDD]                   |            |             |             |
| Energy = −1944.6510198 a.u.                               |            |             |             |
| Zero-point energy correction = 0.330003 a.u.              |            |             |             |
| Single point energy using ωB97XD/6-311++G(2df,2p)[DGDZVP] |            |             |             |
| Energy = −6758.111324 a.u.                                |            |             |             |

Compound **2b**

|    |             |             |             |
|----|-------------|-------------|-------------|
| Pd | 0.71182600  | −0.42493200 | 0.26715500  |
| Cl | −0.23300700 | −2.54195900 | 0.92812100  |
| P  | −1.31668900 | 0.39072500  | −0.18279500 |
| O  | −1.28148200 | 1.93091100  | −0.82015000 |
| N  | 2.71431800  | −1.09235300 | 0.38912400  |
| C  | −0.38138700 | 2.85010700  | −0.15494000 |
| H  | −0.59245500 | 2.84092500  | 0.93332100  |
| H  | −0.65624000 | 3.84437700  | −0.54142500 |
| C  | 1.08763700  | 2.56976700  | −0.41020700 |
| C  | 1.90377400  | 3.65541000  | −0.78579000 |
| H  | 1.44537300  | 4.63744400  | −0.95440600 |
| C  | 3.29004500  | 3.50251600  | −0.93927200 |
| H  | 3.91009200  | 4.35335900  | −1.23618100 |
| C  | 3.87173800  | 2.25438400  | −0.69979000 |
| H  | 4.95615900  | 2.14118100  | −0.79831600 |
| C  | 3.06778100  | 1.15426200  | −0.33077400 |
| C  | 1.64949400  | 1.29004300  | −0.20745000 |
| C  | 3.63608300  | −0.16318300 | −0.01150500 |
| C  | 4.99964100  | −0.51435900 | −0.06919700 |
| H  | 5.73962100  | 0.22119600  | −0.39262100 |
| C  | 5.40070700  | −1.80607600 | 0.28574000  |
| H  | 6.45866800  | −2.08241400 | 0.24114800  |
| C  | 4.43609200  | −2.73884400 | 0.69646700  |
| H  | 4.70704500  | −3.75805500 | 0.98230500  |
| C  | 3.09591600  | −2.33954100 | 0.73043600  |
| H  | 2.27915500  | −3.00768700 | 1.02561400  |
| C  | −2.25883800 | −0.43298900 | −1.51860100 |
| C  | −2.30550700 | 0.12325700  | −2.81280900 |
| H  | −1.79678600 | 1.06906900  | −3.01578700 |
| C  | −3.01386500 | −0.53580500 | −3.82947600 |

|                                                                   |             |             |             |
|-------------------------------------------------------------------|-------------|-------------|-------------|
| H                                                                 | -3.05262600 | -0.09761300 | -4.83176500 |
| C                                                                 | -3.66576400 | -1.75027100 | -3.56393700 |
| H                                                                 | -4.21461000 | -2.26328500 | -4.36004600 |
| C                                                                 | -3.60906200 | -2.30871400 | -2.27613000 |
| H                                                                 | -4.10879600 | -3.25921700 | -2.06570200 |
| C                                                                 | -2.90776900 | -1.65665500 | -1.25264000 |
| H                                                                 | -2.84397200 | -2.10570300 | -0.25714100 |
| C                                                                 | -2.48426200 | 0.52757600  | 1.22978200  |
| C                                                                 | -3.74014500 | 1.14415200  | 1.03982200  |
| H                                                                 | -4.02504000 | 1.51069500  | 0.04816600  |
| C                                                                 | -4.61958900 | 1.28597300  | 2.12136500  |
| H                                                                 | -5.59291600 | 1.76385900  | 1.97183100  |
| C                                                                 | -4.25382700 | 0.81026300  | 3.39323000  |
| H                                                                 | -4.94451900 | 0.91897500  | 4.23553900  |
| C                                                                 | -3.00775900 | 0.19324000  | 3.58225600  |
| H                                                                 | -2.72418100 | -0.18398600 | 4.56959200  |
| C                                                                 | -2.11955200 | 0.05253200  | 2.50394000  |
| H                                                                 | -1.15436500 | -0.44689200 | 2.63480100  |
| Optimization using PBE/6-31+G(d,p)[SDD]                           |             |             |             |
| Energy = -1983.9041486 a.u.                                       |             |             |             |
| Zero-point energy correction = 0.358281 a.u.                      |             |             |             |
| Single point energy using $\omega$ B97XD/6-311++G(2df,2p)[DGDZVP] |             |             |             |
| Energy = -6797.4232729 a.u.                                       |             |             |             |

## Compound 3a

|   |             |             |             |
|---|-------------|-------------|-------------|
| C | -2.38241400 | -1.78986800 | -0.05639400 |
| H | -1.82840400 | -2.73371800 | -0.09804200 |
| C | -3.77953500 | -1.72057600 | -0.00349900 |
| H | -4.36596900 | -2.64241200 | -0.01182400 |
| C | -4.39151700 | -0.45938400 | 0.06164400  |
| H | -5.48133400 | -0.37179100 | 0.10458100  |
| C | -3.59394800 | 0.69066700  | 0.07205100  |
| H | -4.04694500 | 1.68423200  | 0.12335100  |
| C | -2.19441700 | 0.57326200  | 0.01410200  |
| C | -1.21993500 | 1.66943100  | 0.00667900  |
| C | -1.46345600 | 3.05805600  | 0.07170000  |
| H | -2.48317500 | 3.45173900  | 0.14721100  |
| C | -0.37887800 | 3.95042400  | 0.04391000  |
| H | -0.56701200 | 5.02633500  | 0.10466000  |
| C | 0.95095300  | 3.48669300  | -0.06816500 |
| H | 1.77331100  | 4.21096200  | -0.10232300 |
| C | 1.20328600  | 2.10649000  | -0.14644700 |
| C | 0.11628400  | 1.21790000  | -0.09036700 |
| C | 2.53329700  | 1.43536700  | -0.39563300 |
| H | 2.73493000  | 1.42580100  | -1.48171900 |
| H | 3.39110500  | 1.93892300  | 0.09326600  |
| C | 2.84414400  | -0.12340600 | 1.48741300  |
| H | 2.71065400  | -1.16647600 | 1.80890000  |
| H | 2.18146000  | 0.52574700  | 2.07737900  |
| H | 3.89846100  | 0.18620400  | 1.63869200  |

|                                                           |             |             |             |
|-----------------------------------------------------------|-------------|-------------|-------------|
| C                                                         | 3.42580000  | −0.83614800 | −0.75997600 |
| H                                                         | 4.46257700  | −0.46408500 | −0.63624200 |
| H                                                         | 3.13637400  | −0.78553100 | −1.81959400 |
| H                                                         | 3.35140700  | −1.88208700 | −0.42906600 |
| Cl                                                        | 0.85433200  | −3.05241600 | 0.04383200  |
| N                                                         | −1.61361900 | −0.68095900 | −0.05085200 |
| N                                                         | 2.48266200  | −0.01701700 | 0.04464200  |
| Pd                                                        | 0.44581800  | −0.67783400 | −0.07919600 |
| Optimization using PBE/6-31+G(d,p)[SDD]                   |             |             |             |
| Energy = −1239.2122694 a.u.                               |             |             |             |
| Zero-point energy correction = 0.257010 a.u.              |             |             |             |
| Single point energy using ωB97XD/6-311++G(2df,2p)[DGDZVP] |             |             |             |
| Energy = −6052.0888771 a.u.                               |             |             |             |

Compound **3b**

|    |             |             |             |
|----|-------------|-------------|-------------|
| Pd | 0.27026900  | −0.63823000 | −0.01593600 |
| Cl | 0.81527300  | −2.98581600 | 0.17478900  |
| N  | −1.78937800 | −0.75414500 | −0.02363900 |
| N  | 2.28480800  | 0.10755900  | 0.03652700  |
| C  | −2.50083600 | −1.90014600 | 0.01620600  |
| H  | −1.90048600 | −2.81592000 | 0.04186300  |
| C  | −3.90066600 | −1.90193400 | 0.02869900  |
| H  | −4.43882900 | −2.85231000 | 0.06083400  |
| C  | −4.57787800 | −0.67306800 | 0.00140800  |
| H  | −5.67155200 | −0.64037600 | 0.01115400  |
| C  | −3.84035900 | 0.51563400  | −0.03802200 |
| H  | −4.34523900 | 1.48503500  | −0.05941500 |
| C  | −2.43525800 | 0.46860100  | −0.05108300 |
| C  | −1.51941500 | 1.61324800  | −0.09346200 |
| C  | −1.84433600 | 2.98577500  | −0.11457100 |
| H  | −2.88699600 | 3.32227000  | −0.10013500 |
| C  | −0.81176700 | 3.93733400  | −0.15030800 |
| H  | −1.06201000 | 5.00228700  | −0.16154900 |
| C  | 0.54431200  | 3.54561200  | −0.17397800 |
| H  | 1.32539200  | 4.31457500  | −0.20741000 |
| C  | 0.88072600  | 2.17990600  | −0.15849400 |
| C  | −0.15629100 | 1.23345600  | −0.11215500 |
| C  | 2.27506100  | 1.60654400  | −0.25176700 |
| H  | 2.99127000  | 2.10553700  | 0.42862600  |
| H  | 2.66453600  | 1.74942800  | −1.27410000 |
| C  | 2.84211500  | −0.15976500 | 1.40988800  |
| H  | 3.89303200  | 0.19987500  | 1.42353200  |
| H  | 2.85084500  | −1.25614700 | 1.52255000  |
| C  | 2.04991400  | 0.47033800  | 2.55149300  |
| H  | 2.00841900  | 1.56998300  | 2.48939200  |
| H  | 2.53233600  | 0.20478300  | 3.50669000  |
| H  | 1.01617000  | 0.08730100  | 2.56378900  |
| C  | 3.15329000  | −0.61403800 | −0.95808100 |
| H  | 3.23929600  | −1.64767700 | −0.58702300 |
| H  | 4.16066900  | −0.14781200 | −0.93709600 |

|                                                                   |            |             |             |
|-------------------------------------------------------------------|------------|-------------|-------------|
| C                                                                 | 2.59100600 | -0.64524100 | -2.37618200 |
| H                                                                 | 2.45986800 | 0.35702500  | -2.81690700 |
| H                                                                 | 1.61813800 | -1.16359900 | -2.38778400 |
| H                                                                 | 3.28740100 | -1.20421900 | -3.02314400 |
| Optimization using PBE/6-31+G(d,p)[SDD]                           |            |             |             |
| Energy = -1317.7330461 a.u.                                       |            |             |             |
| Zero-point energy correction = 0.311645 a.u.                      |            |             |             |
| Single point energy using $\omega$ B97XD/6-311++G(2df,2p)[DGDZVP] |            |             |             |
| Energy = -6130.7249275 a.u.                                       |            |             |             |

## Compound 3c

|                                         |             |             |             |
|-----------------------------------------|-------------|-------------|-------------|
| Pd                                      | 0.06872600  | -0.63258100 | -0.15098300 |
| Cl                                      | -0.49243900 | -2.97834600 | -0.05697400 |
| O                                       | -4.71370600 | -0.44776900 | 0.57506400  |
| N                                       | 2.11889600  | -0.77521000 | -0.00741900 |
| N                                       | -1.93298100 | 0.16325200  | -0.14996700 |
| C                                       | 2.81215400  | -1.93265400 | 0.02875600  |
| H                                       | 2.20236900  | -2.83940800 | -0.04440600 |
| C                                       | 4.20586700  | -1.95590400 | 0.15840100  |
| H                                       | 4.72875100  | -2.91499600 | 0.18219600  |
| C                                       | 4.89639800  | -0.73841700 | 0.25719500  |
| H                                       | 5.98560100  | -0.72346200 | 0.36044400  |
| C                                       | 4.17762000  | 0.46193000  | 0.22282400  |
| H                                       | 4.69223200  | 1.42347900  | 0.29830700  |
| C                                       | 2.77865300  | 0.43732100  | 0.08770400  |
| C                                       | 1.88227500  | 1.59601800  | 0.02310500  |
| C                                       | 2.21508300  | 2.96531700  | 0.09483300  |
| H                                       | 3.25321300  | 3.29033600  | 0.22598100  |
| C                                       | 1.19656400  | 3.92845700  | 0.00163200  |
| H                                       | 1.45315800  | 4.98983300  | 0.06780400  |
| C                                       | -0.15282600 | 3.55351200  | -0.18183000 |
| H                                       | -0.92151900 | 4.33100600  | -0.26507000 |
| C                                       | -0.49314200 | 2.19226800  | -0.26795000 |
| C                                       | 0.52600800  | 1.23393900  | -0.14649800 |
| C                                       | -1.85477700 | 1.62177500  | -0.58349800 |
| H                                       | -2.00732700 | 1.62715300  | -1.67797800 |
| H                                       | -2.67957000 | 2.20965500  | -0.14306600 |
| C                                       | -2.86716500 | -0.62978400 | -1.01795100 |
| H                                       | -2.69716700 | -1.68998000 | -0.76633200 |
| H                                       | -2.57206500 | -0.47744500 | -2.06923900 |
| C                                       | -4.33383900 | -0.25615500 | -0.79134700 |
| H                                       | -4.54215000 | 0.79334700  | -1.09735300 |
| H                                       | -4.97996400 | -0.91840300 | -1.38964100 |
| C                                       | -3.90269900 | 0.35868600  | 1.43153000  |
| H                                       | -4.21533800 | 0.13244900  | 2.46379800  |
| H                                       | -4.11306000 | 1.43473600  | 1.24387000  |
| C                                       | -2.41148400 | 0.03665600  | 1.27464900  |
| H                                       | -1.79352200 | 0.69819900  | 1.90359100  |
| H                                       | -2.22346400 | -1.00782700 | 1.57270800  |
| Optimization using PBE/6-31+G(d,p)[SDD] |             |             |             |



|                                                                   |
|-------------------------------------------------------------------|
| Energy = -1391.6718472 a.u.                                       |
| Zero-point energy correction = 0.297406 a.u.                      |
| Single point energy using $\omega$ B97XD/6-311++G(2df,2p)[DGDZVP] |
| Energy = -6204.7210608 a.u.                                       |

### S3. Experimental Spectral Data

#### 2-3-[(Ethylsulfanyl)methyl]phenylpyridine, 6b, $^1\text{H}$ NMR.

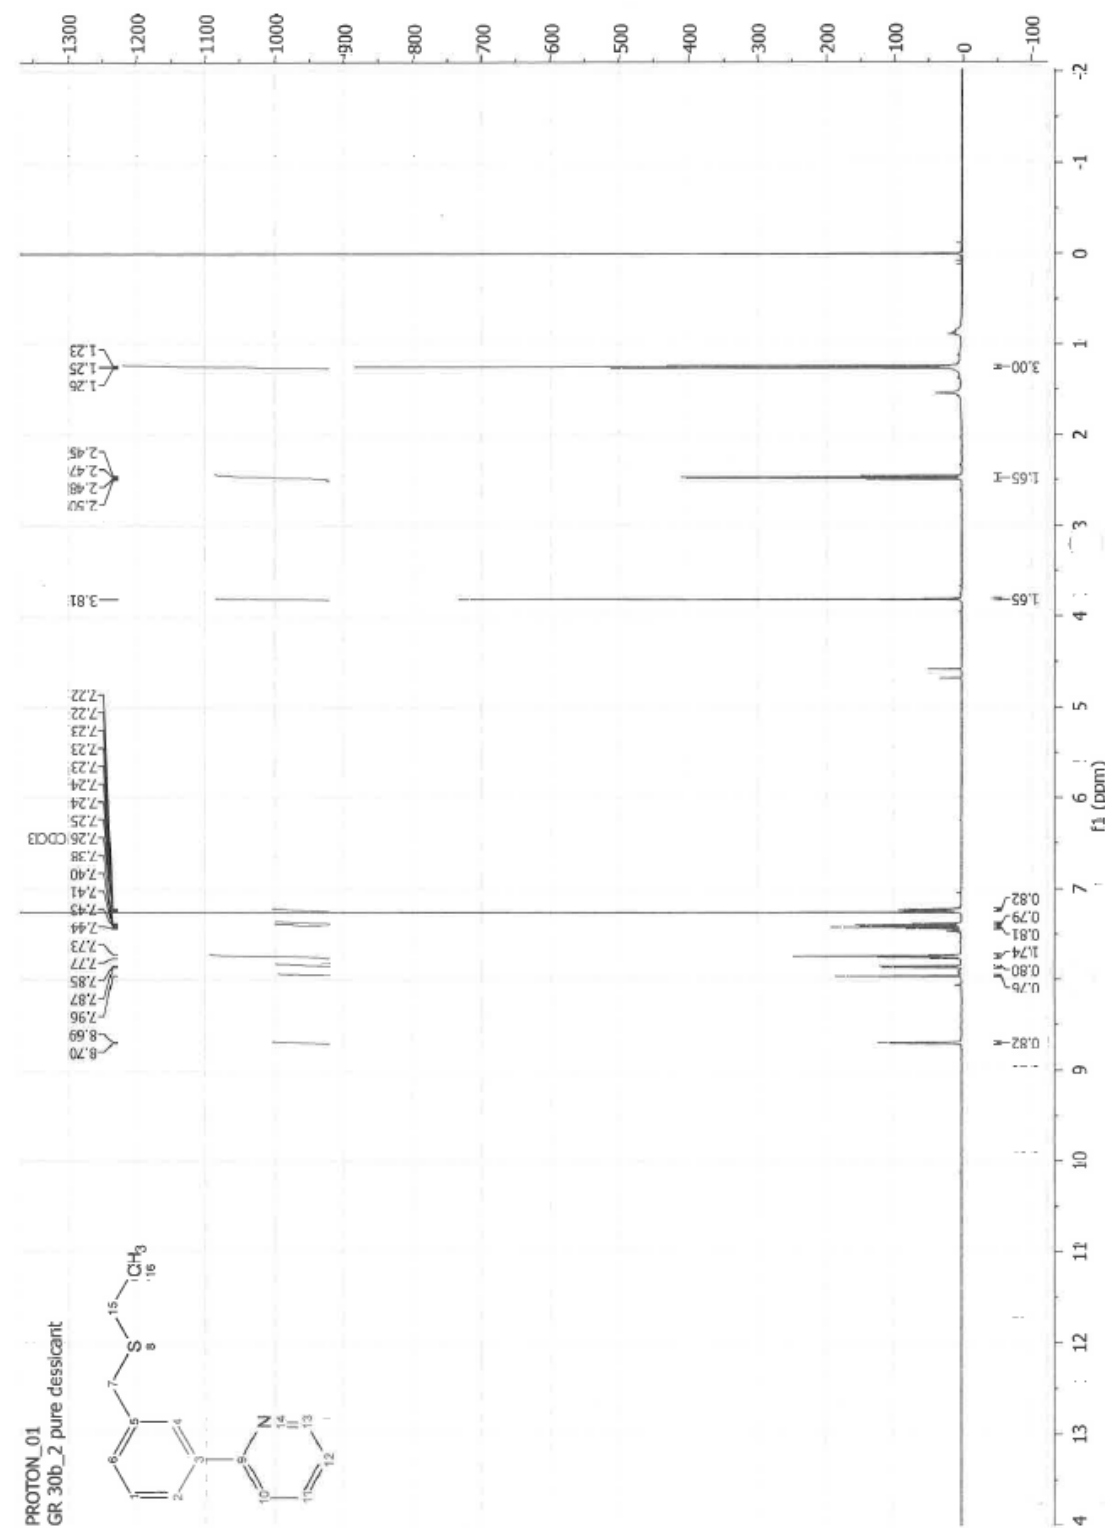

2-3-[(Ethylsulfanyl)methyl]phenylpyridine, 6b,  $^{13}\text{C}$  NMR.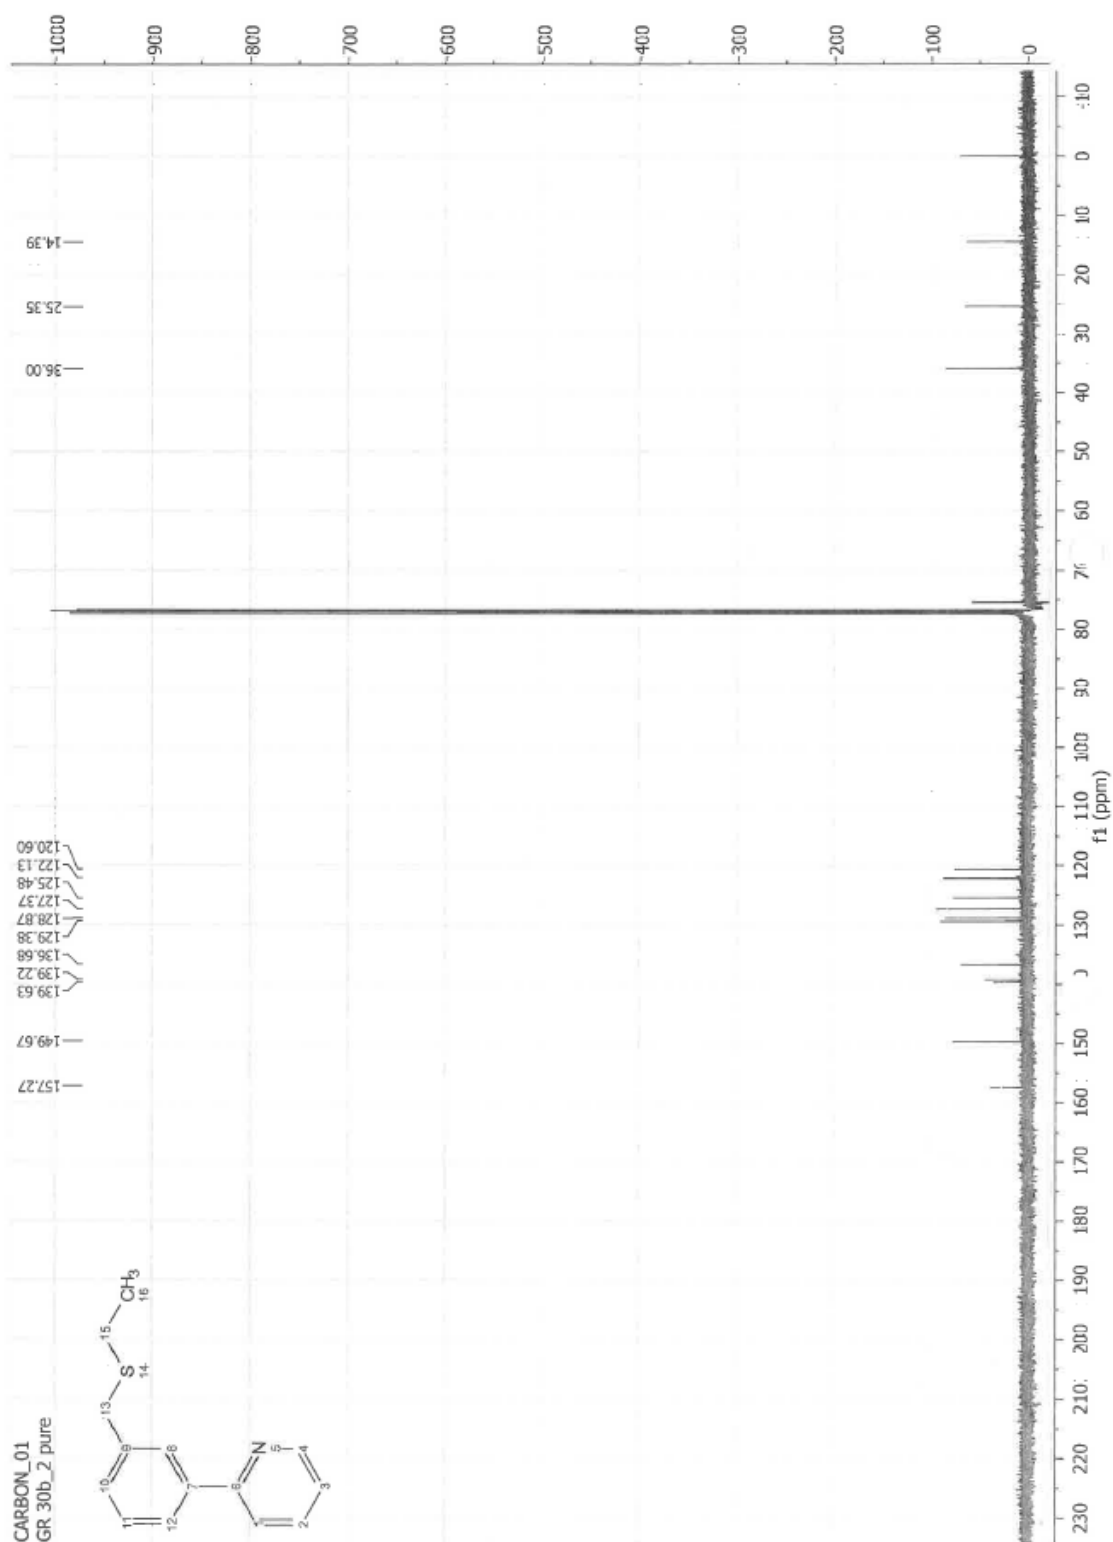

2-3-[(Ethylsulfanyl)methyl]phenylpyridine, 6b,  $^{13}\text{C}$  HRMS.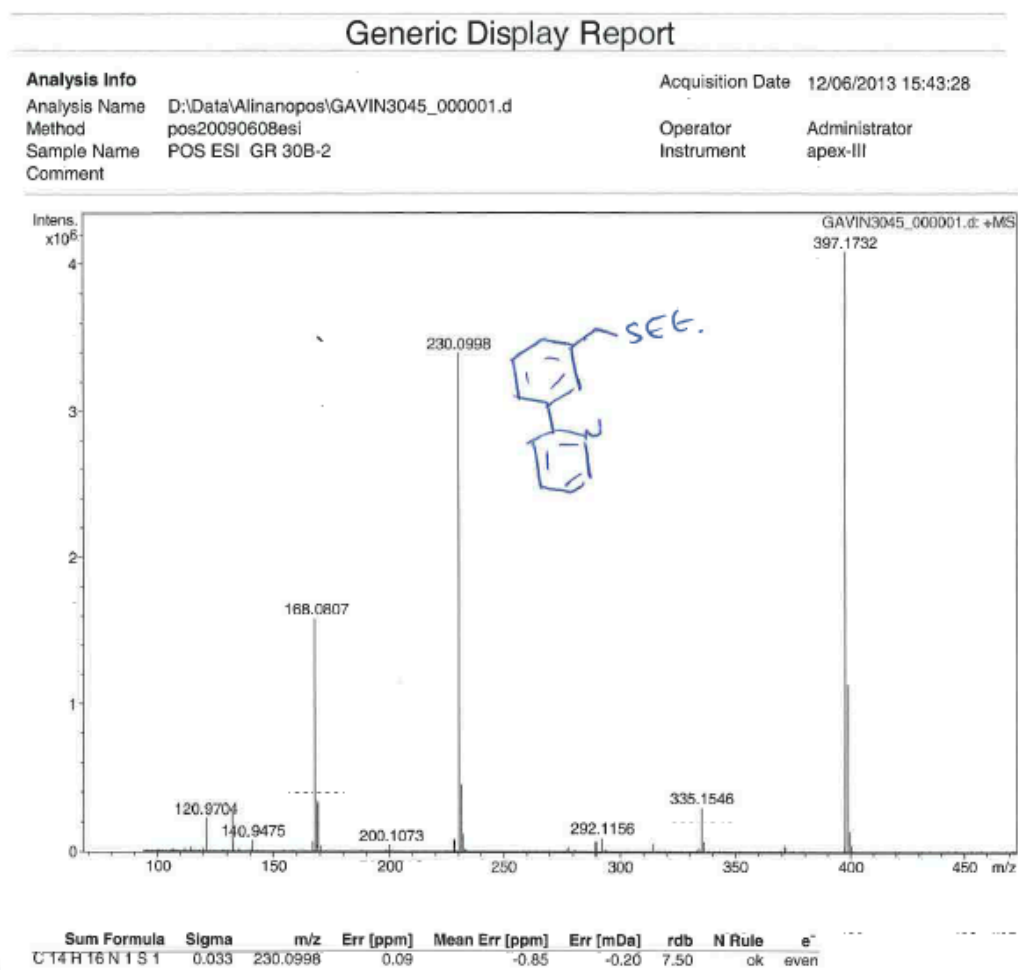

2-3-[(Propylsulfanyl)methyl]phenylpyridine, 6c.  $^1\text{H}$  NMR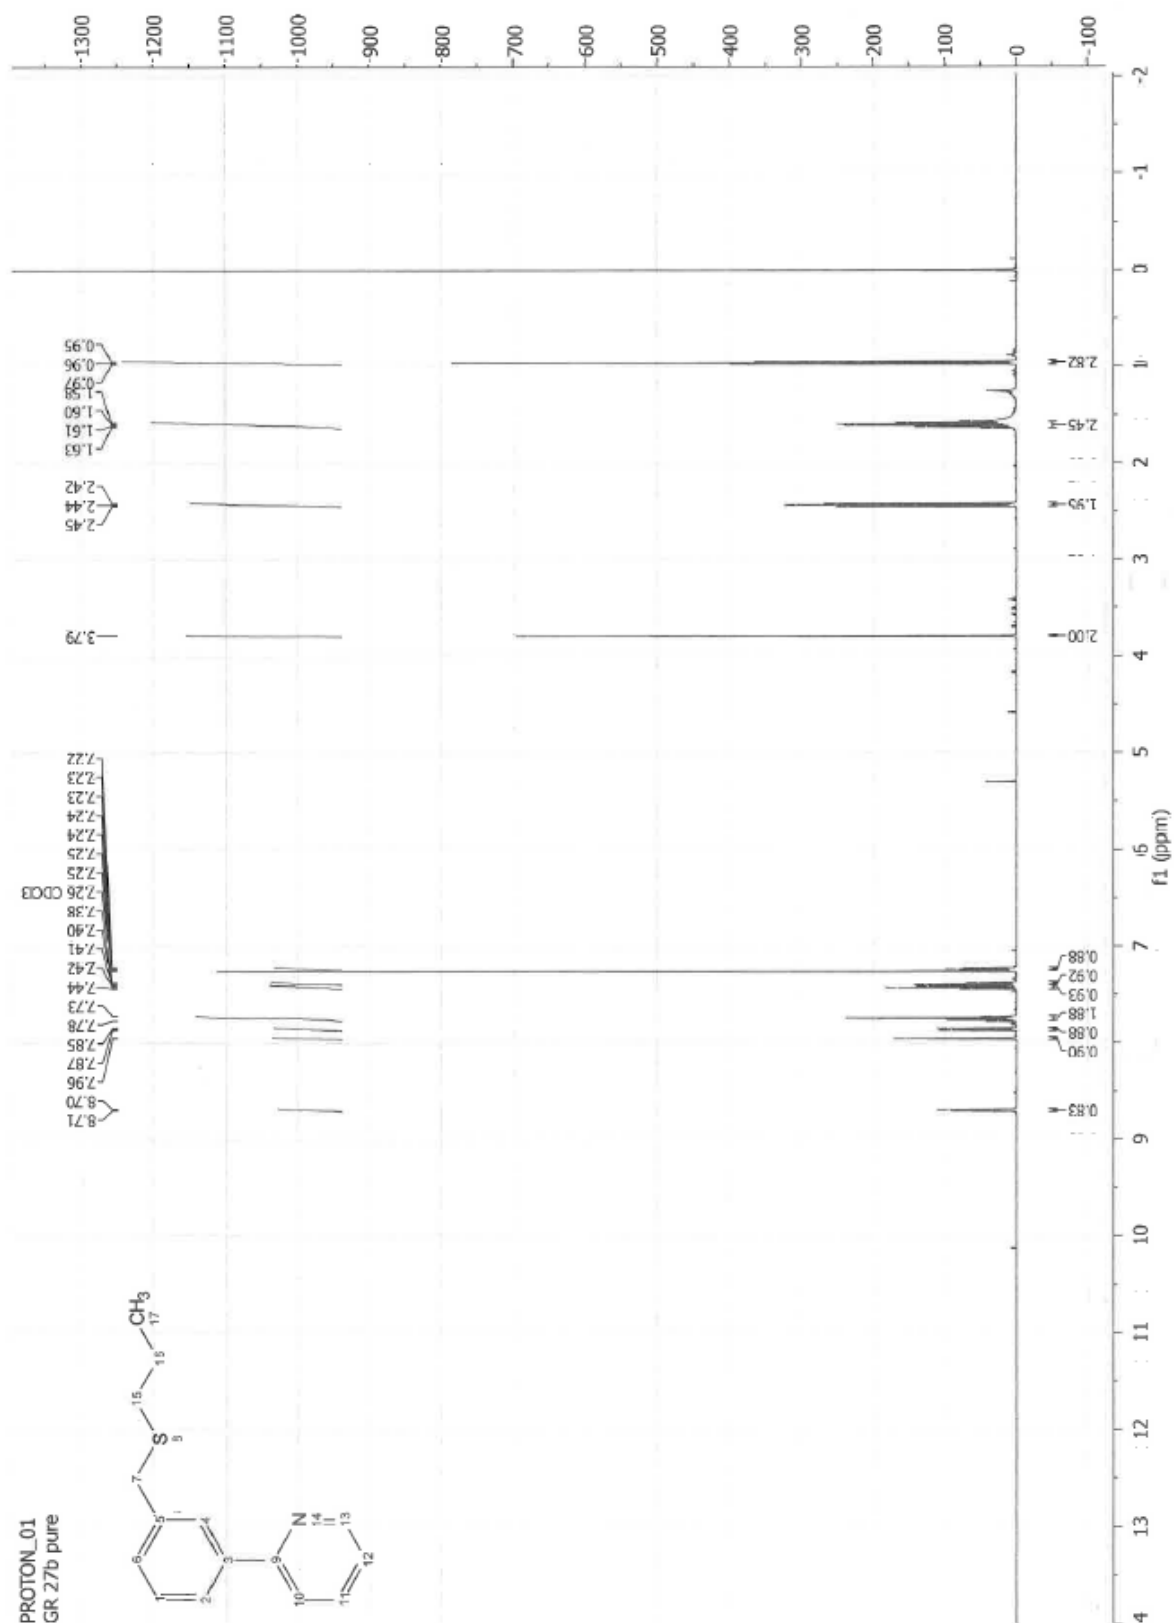

2-3-[(Propylsulfanyl)methyl]phenylpyridine, 6c.  $^{13}\text{C}$  NMR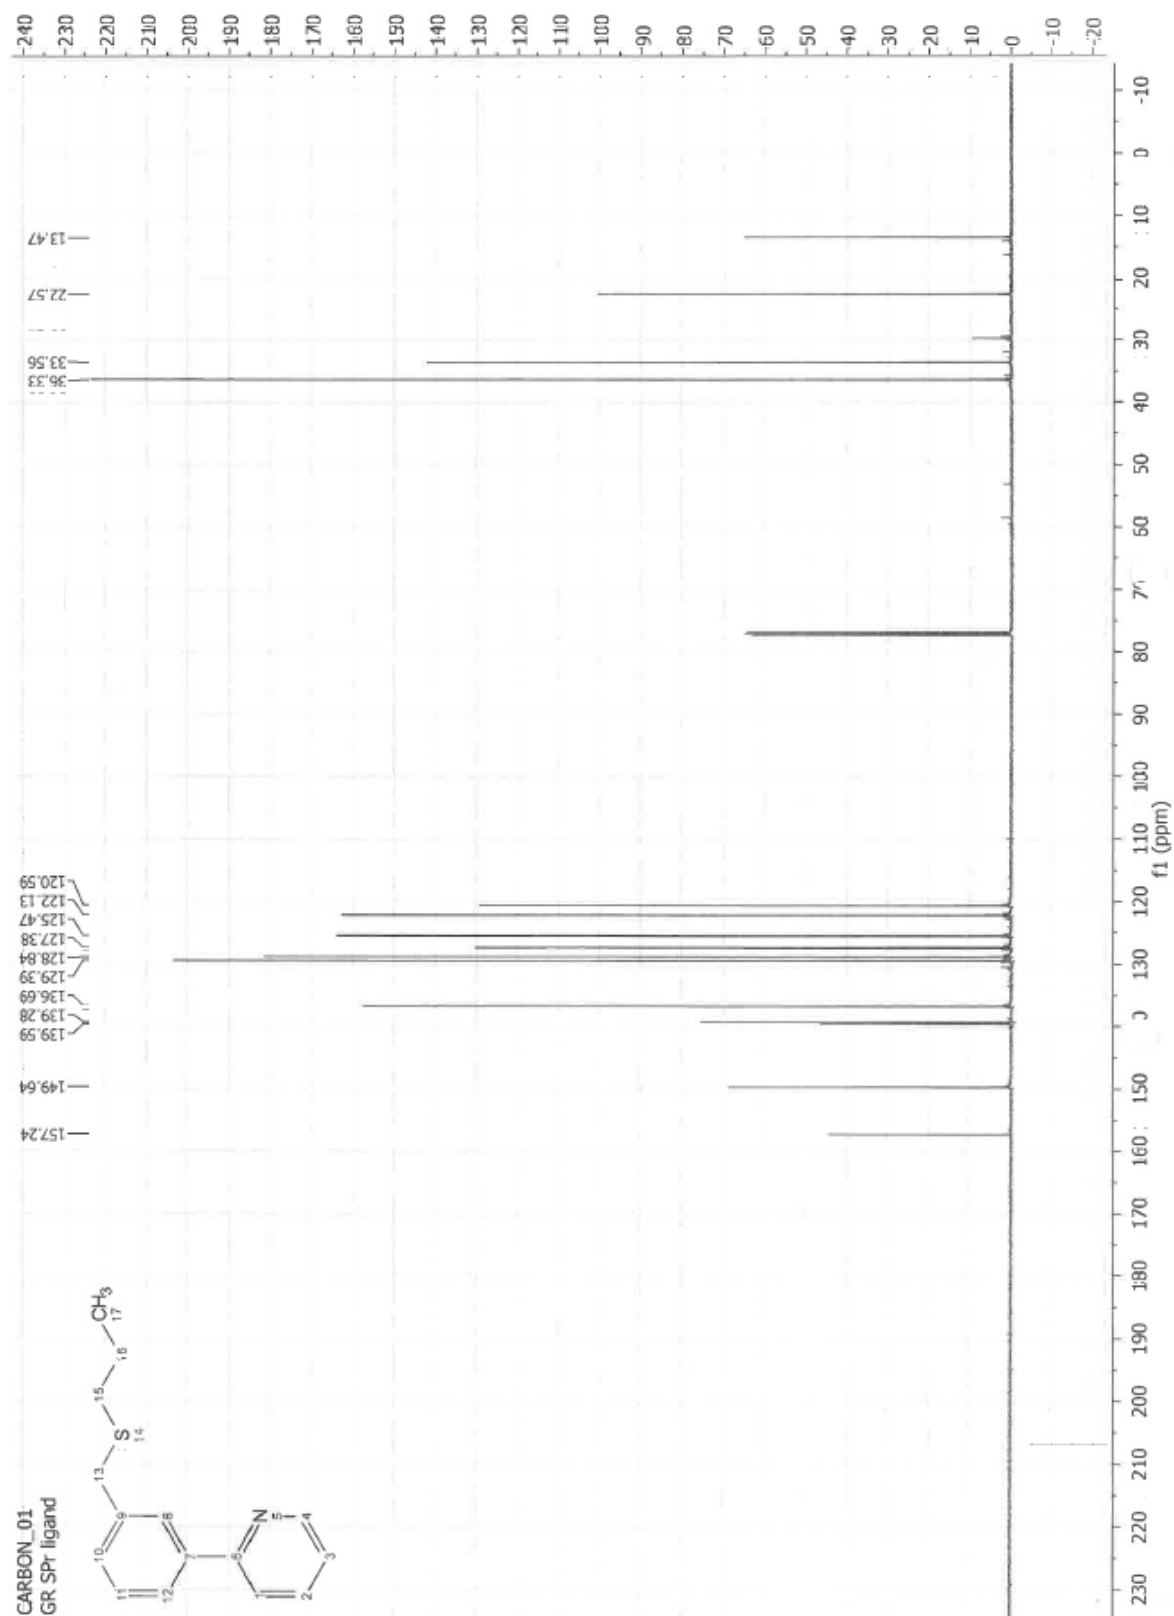

## 2-3-[(Propylsulfanyl)methyl]phenylpyridine, 6c. HRMS

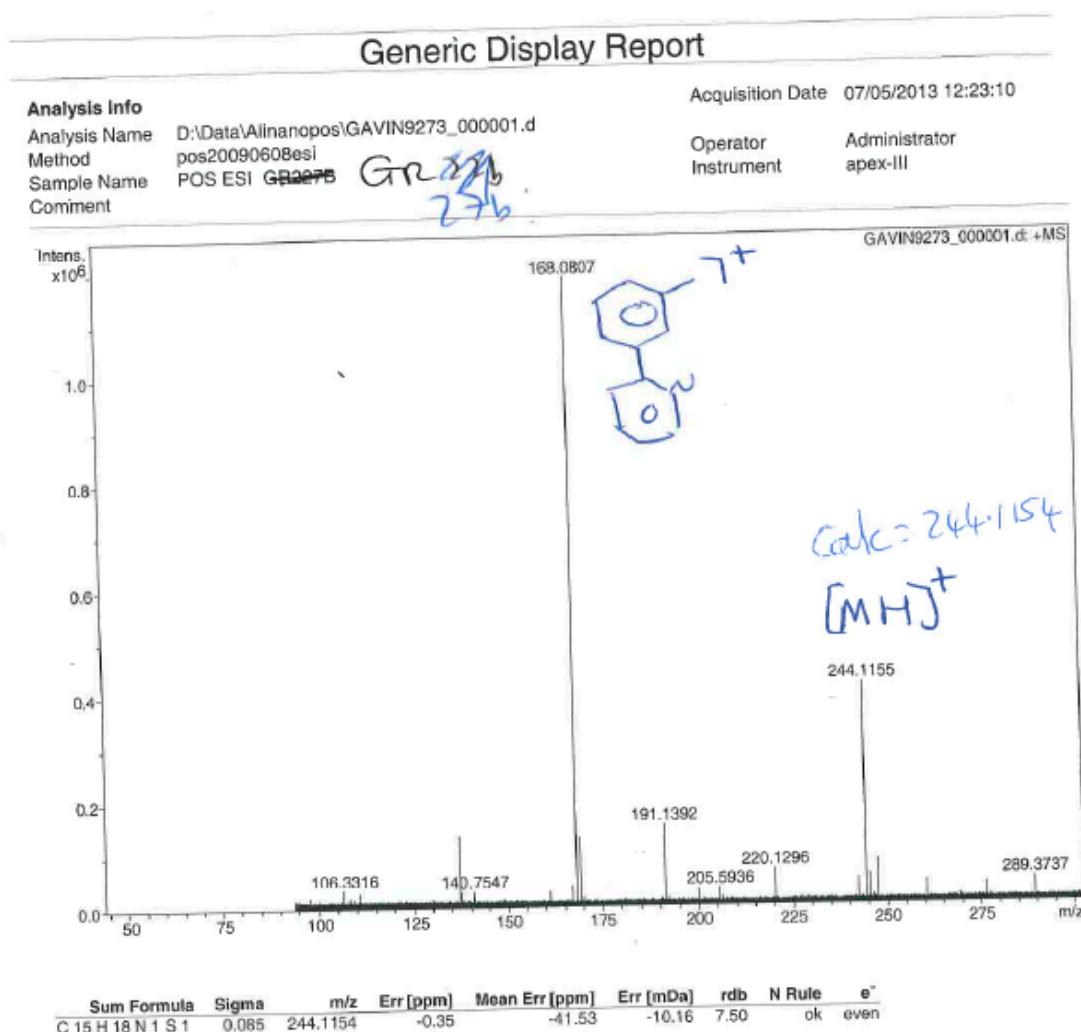

2-(3-[(4-Methylphenyl)sulfanyl]methylphenyl)pyridine, 6e.  $^1\text{H}$  NMR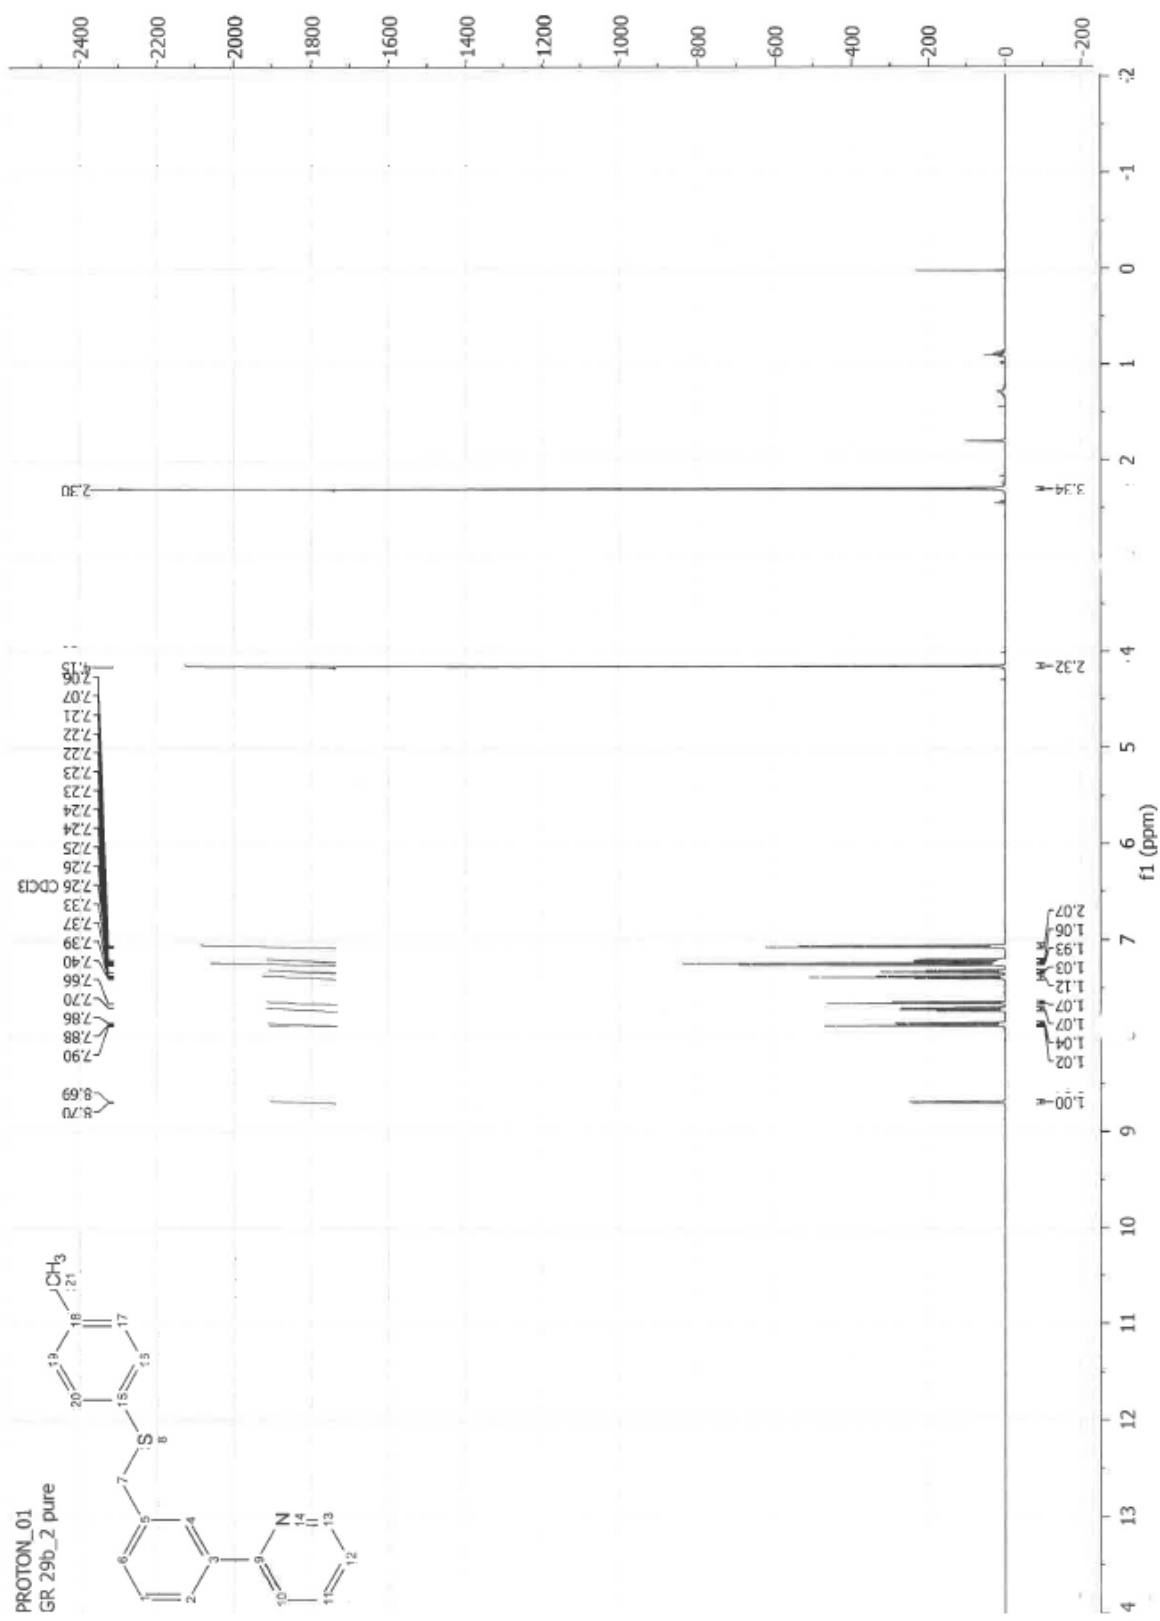

2-(3-[(4-Methylphenyl)sulfanyl]methylphenyl)pyridine, 6e.  $^{13}\text{C}$  NMR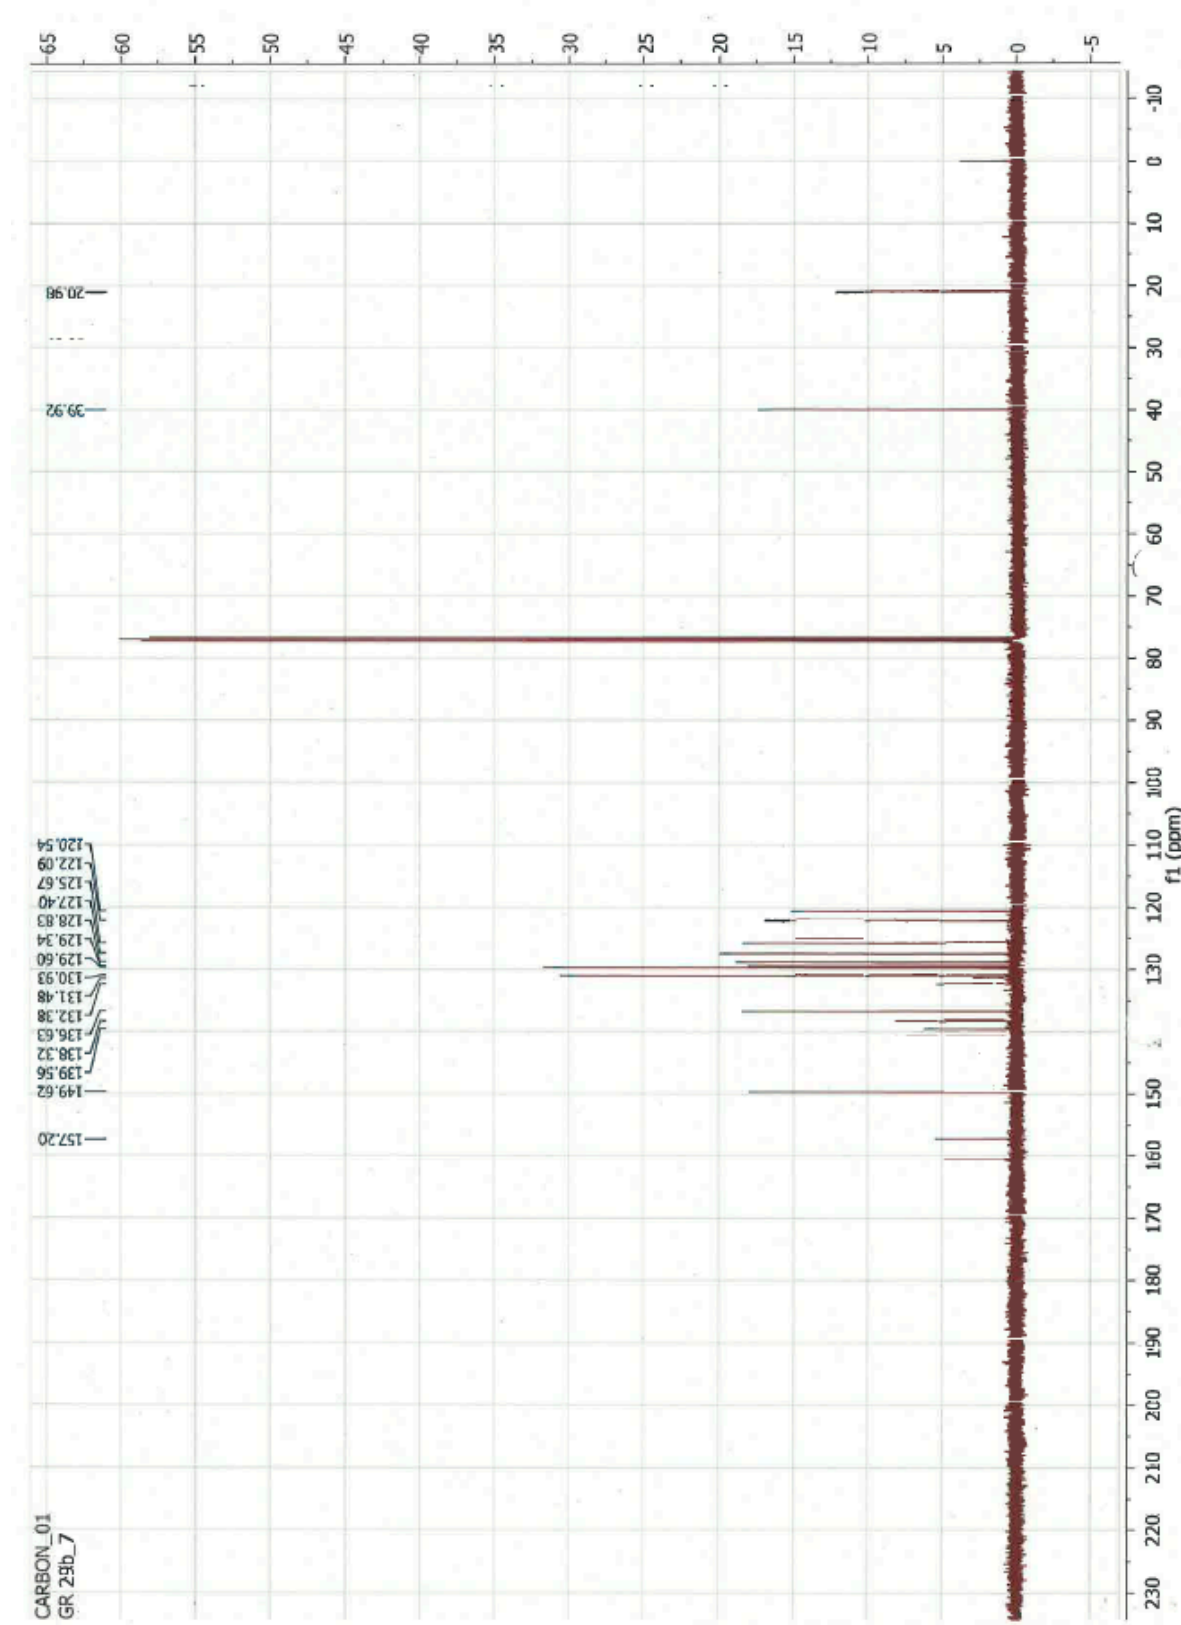



## 2-(3-[(4-Methylphenyl)sulfonyl]methylphenyl)pyridine, 6e. HRMS

## Generic Display Report

## Analysis Info

Analysis Name D:\Data\Alinanopos\GAVIN3044\_000001.d  
Method pos20090608esi  
Sample Name POS ESI GR 29B  
Comment

Acquisition Date 12/06/2013 15:38:22

Operator Administrator  
Instrument apex-III

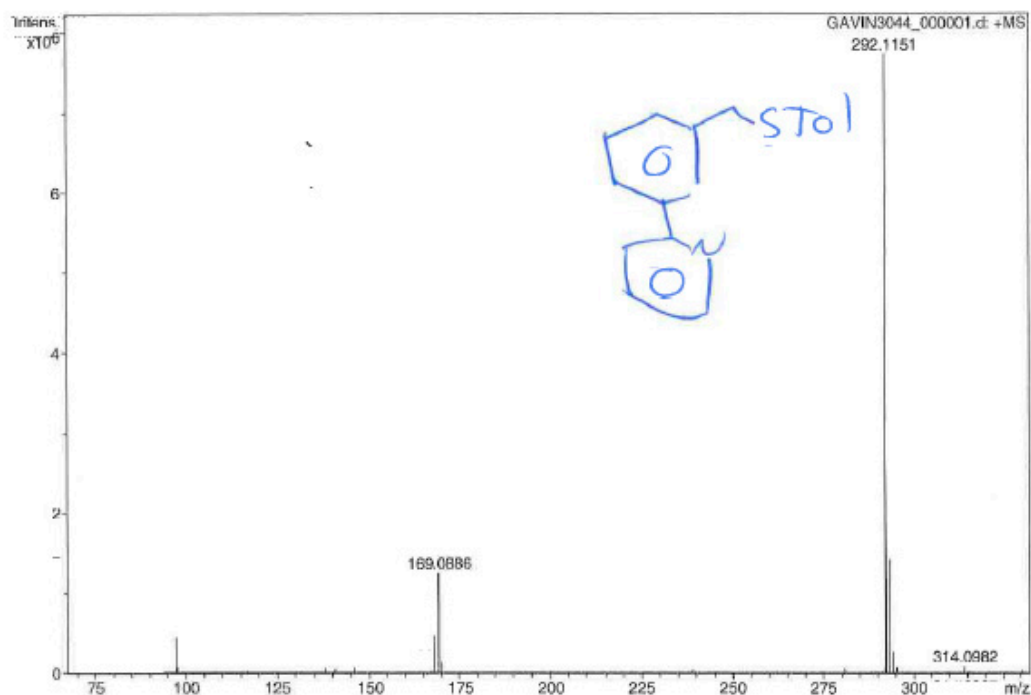

| Sum Formula       | Sigma | m/z      | Err [ppm] | Mean Err [ppm] | Err [mDa] | rdb   | N Rule | e <sup>-</sup> |
|-------------------|-------|----------|-----------|----------------|-----------|-------|--------|----------------|
| C 19 H 18 N 1 S 1 | 0.027 | 292.1154 | 1.11      | 0.75           | 0.22      | 11.50 | ok     | even           |

2-(3-[(4-Methoxyphenyl)sulfanyl]methylphenyl)pyridine, 6f.  $^1\text{H}$  NMR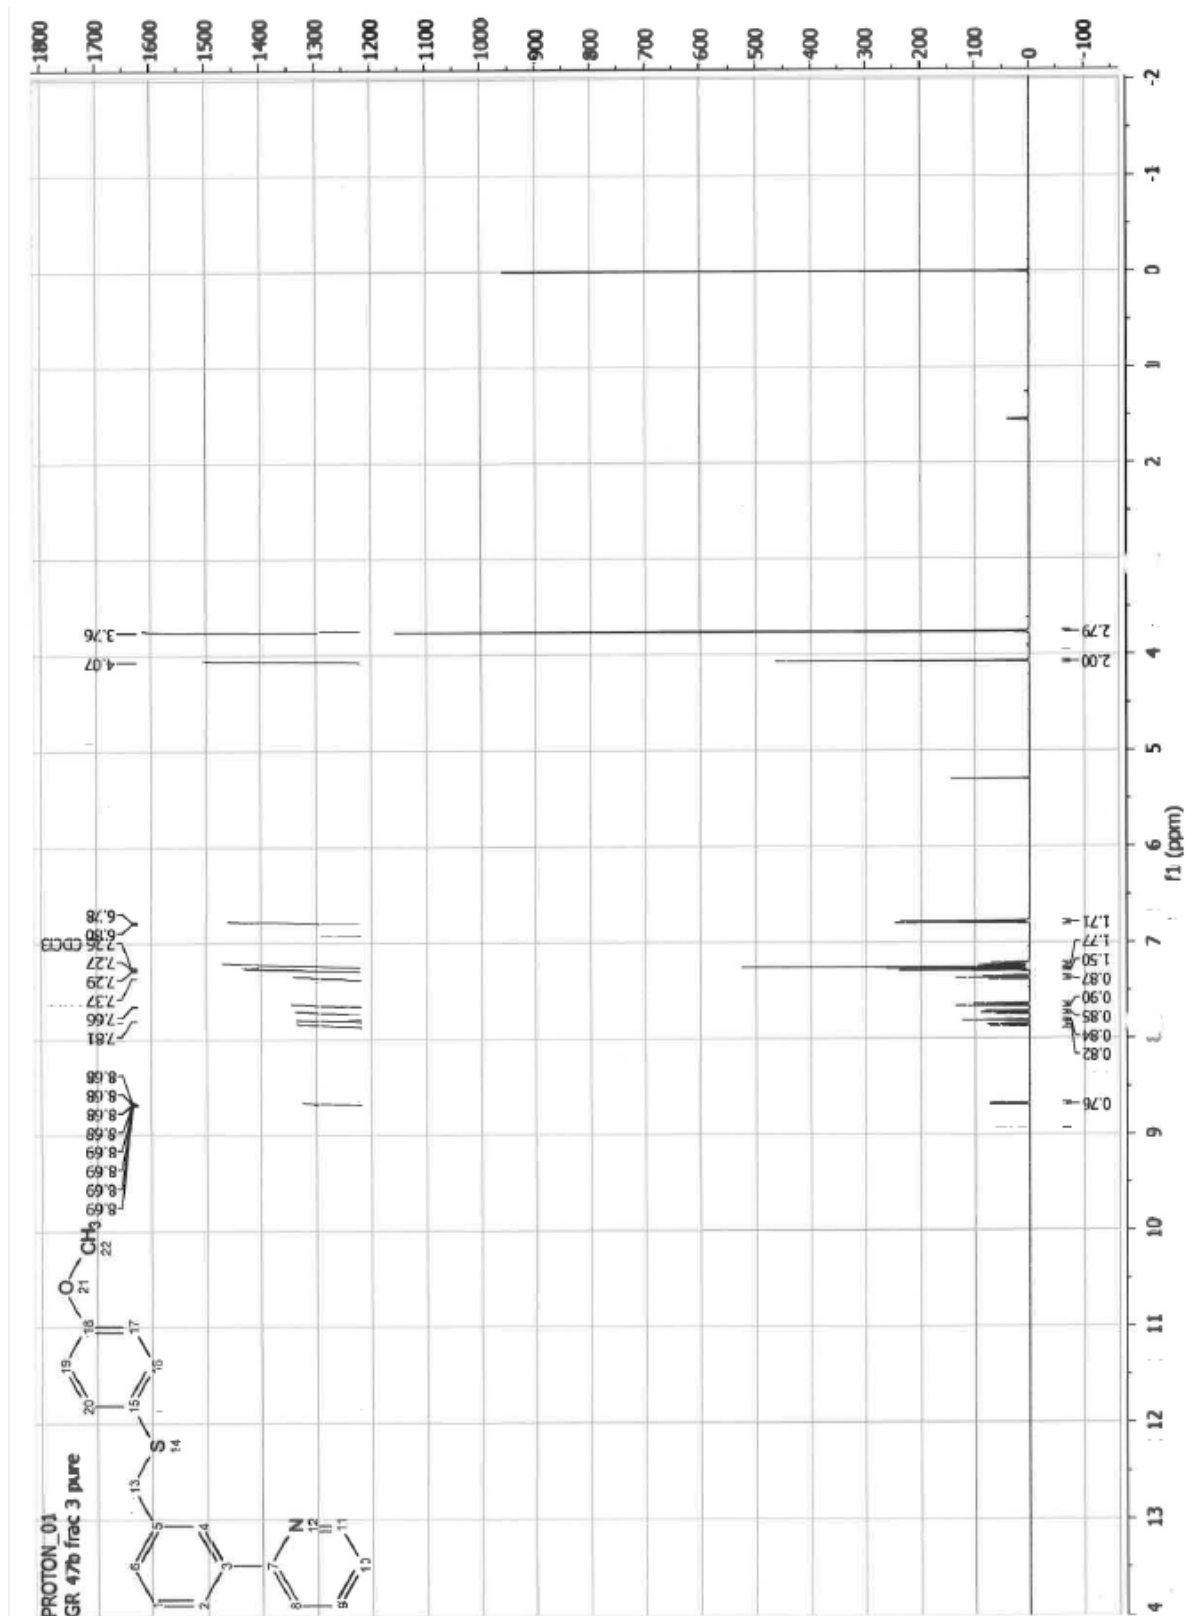

2-(3-[(4-Methoxyphenyl)sulfonyl]methylphenyl)pyridine, 6f.  $^{13}\text{C}$  NMR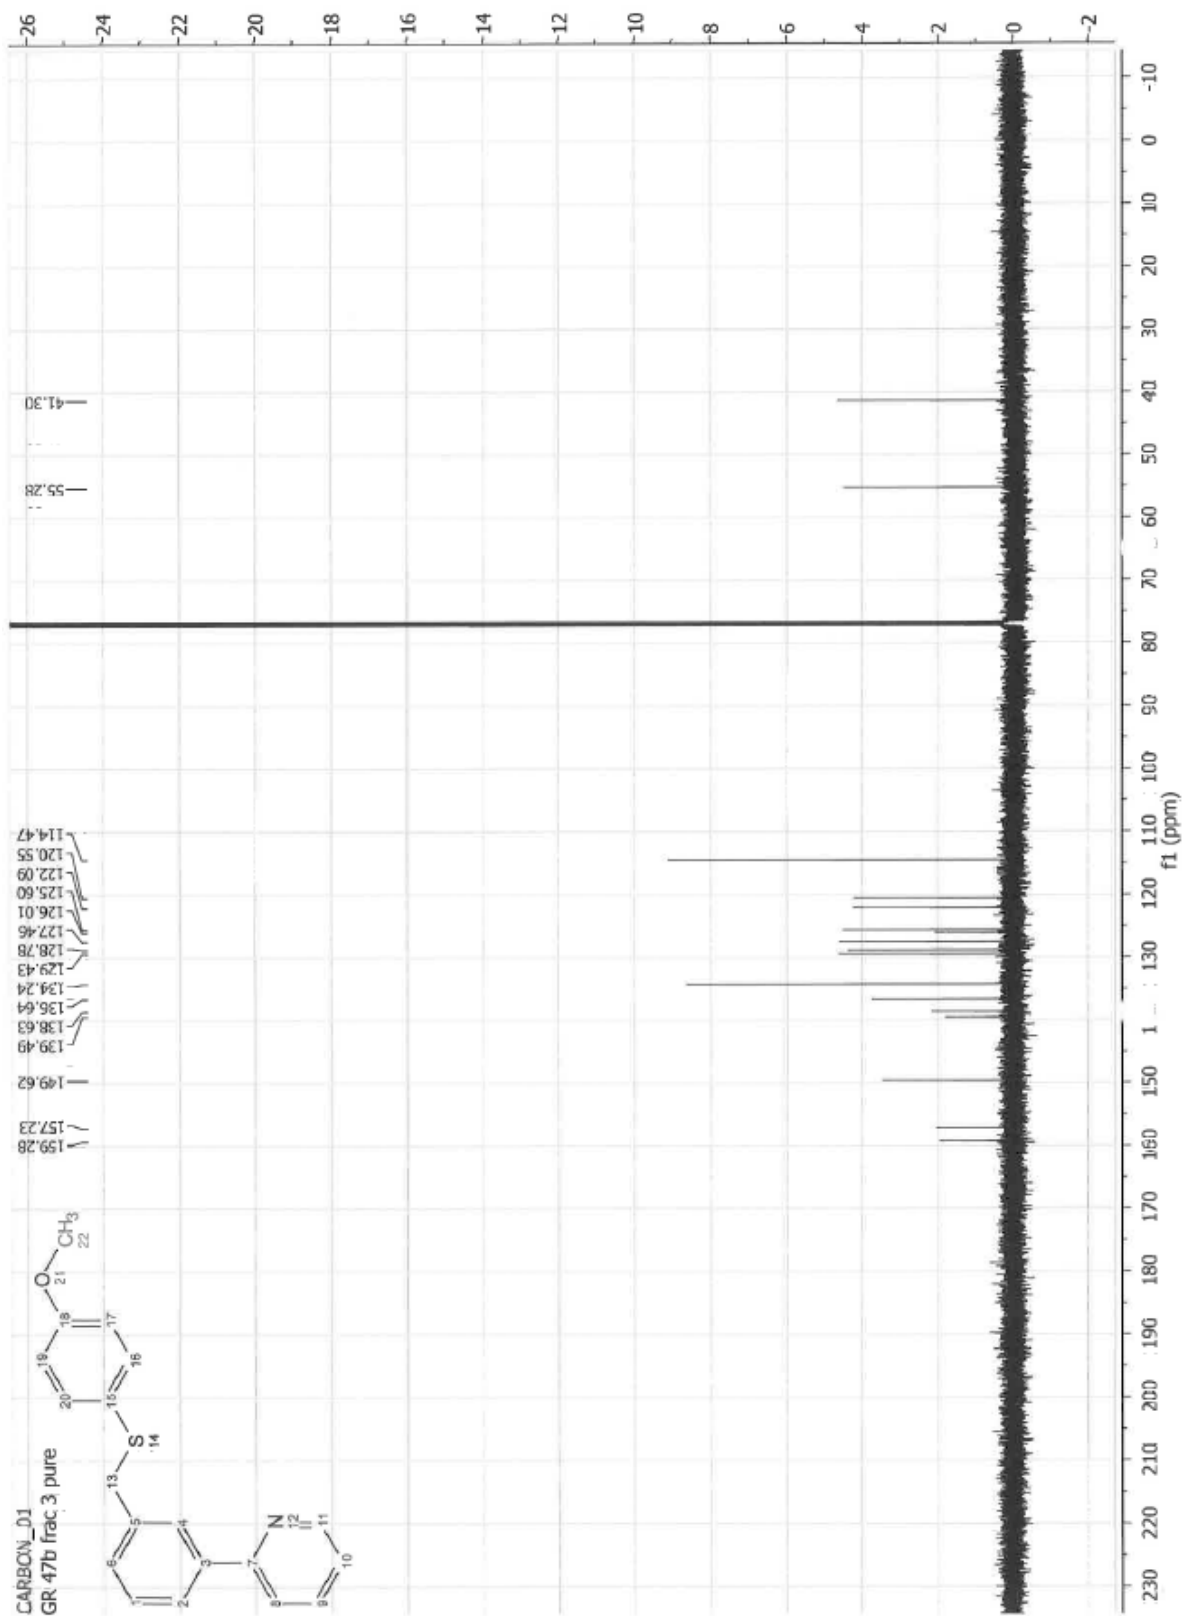

## 2-(3-[(4-Methoxyphenyl)sulfonyl]methylphenyl)pyridine, 6f. HRMS

## Generic Display Report

## Analysis Info

Analysis Name D:\Data\Alinanopos\GAVIN3314\_000003.d  
Method pos20090608esi  
Sample Name POS ESI GR47B  
Comment

Acquisition Date 28/10/2013 15:53:24

Operator Administrator  
Instrument apex-III

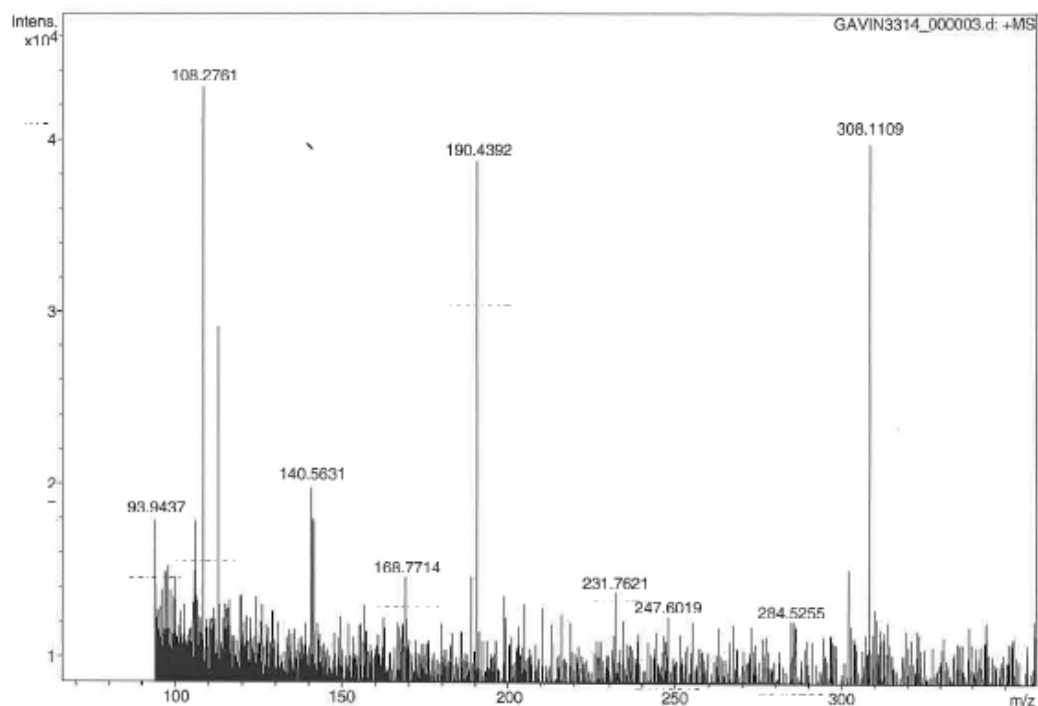

| Sum                   | Formula | Sigma | m/z      | Err (ppm) | Mean Err (ppm) | Err (mDa) | rdb   | N Rule | e <sup>-</sup> |
|-----------------------|---------|-------|----------|-----------|----------------|-----------|-------|--------|----------------|
| C 19 H 18 N 1 O 1 S 1 |         | 0.147 | 308.1104 | -1.76     | -20.59         | -6.36     | 11.50 | ok     | even           |

2-3-[(Ethylsulfanyl)methyl]phenylpyridine chloro-palladacycle, 1b.  $^1\text{H}$  NMR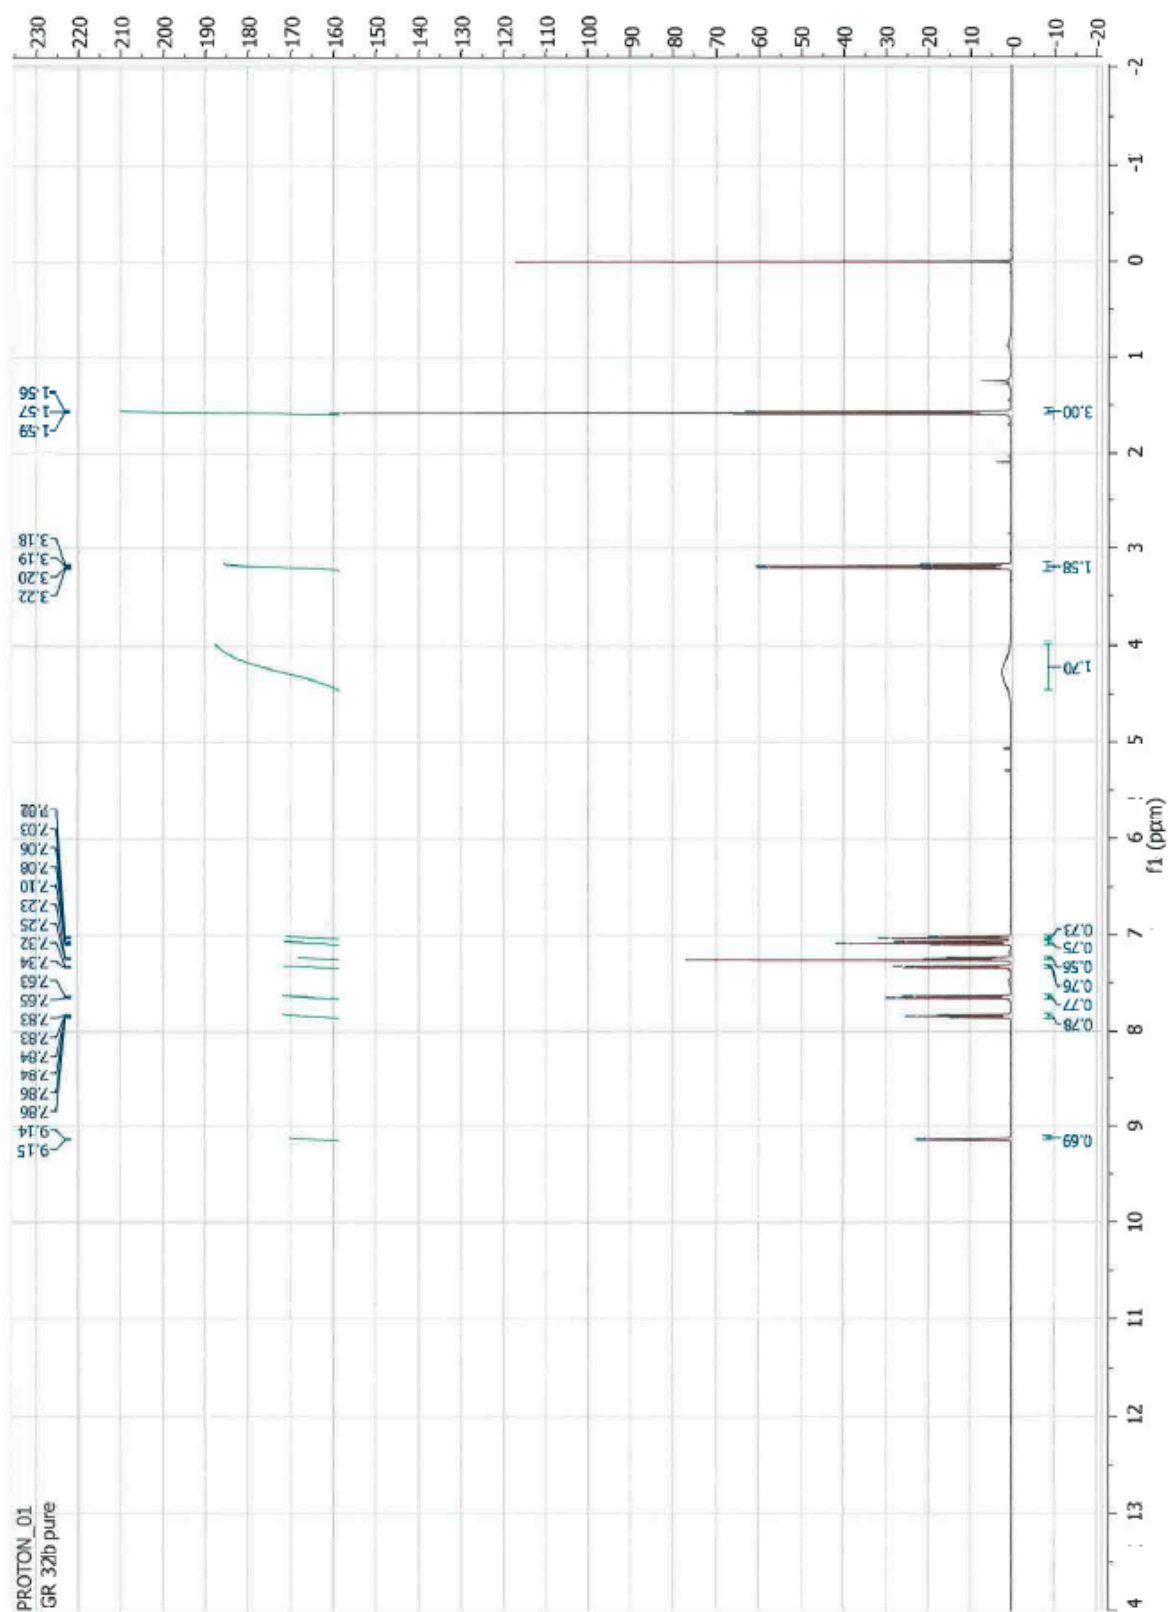

2-3-[(Ethylsulfanyl)methyl]phenylpyridine chloro-palladacycle, 1b.  $^{13}\text{C}$  NMR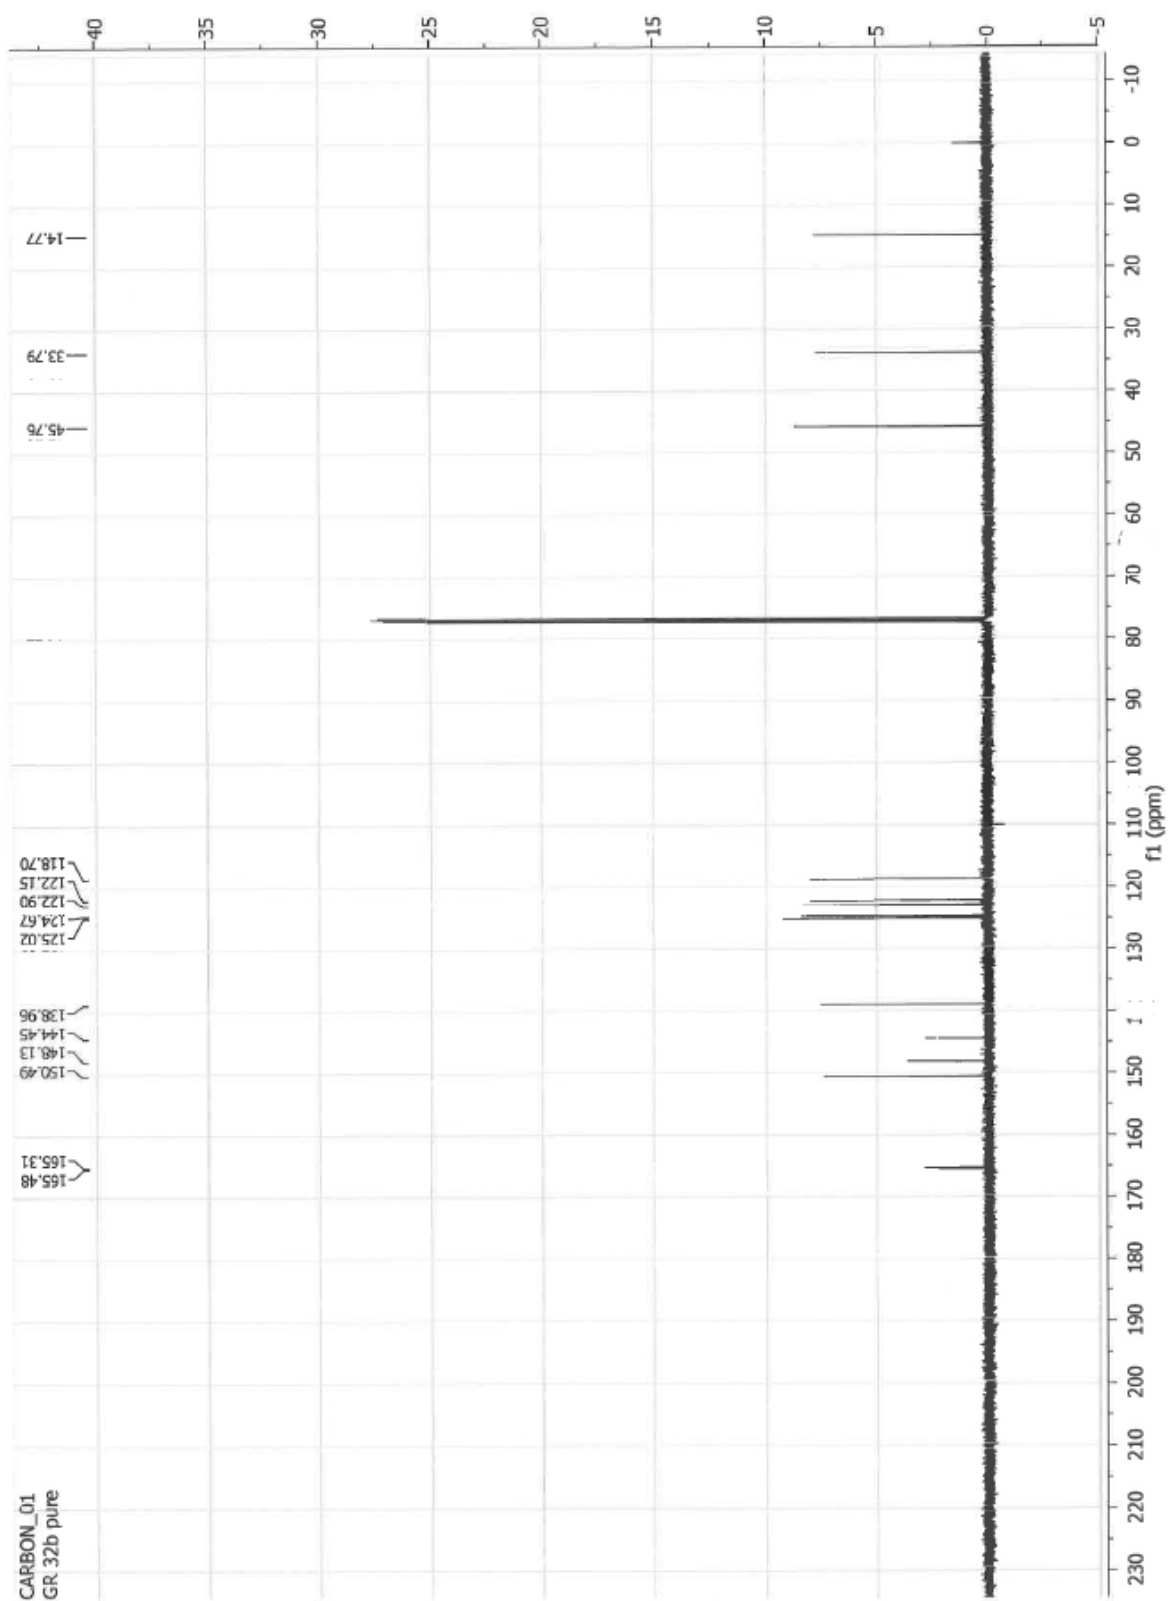

## 2-3-[(Ethylsulfanyl)methyl]phenylpyridine chloro-palladacycle, 1b. HRMS

## Generic Display Report

## Analysis Info

Analysis Name D:\Data\Alinanopos\GAVIN3160\_000001.d  
Method pos20090608esi  
Sample Name POS ESI GR32B  
Comment

Acquisition Date 12/08/2013 13:22:19

Operator Administrator  
Instrument apex-III

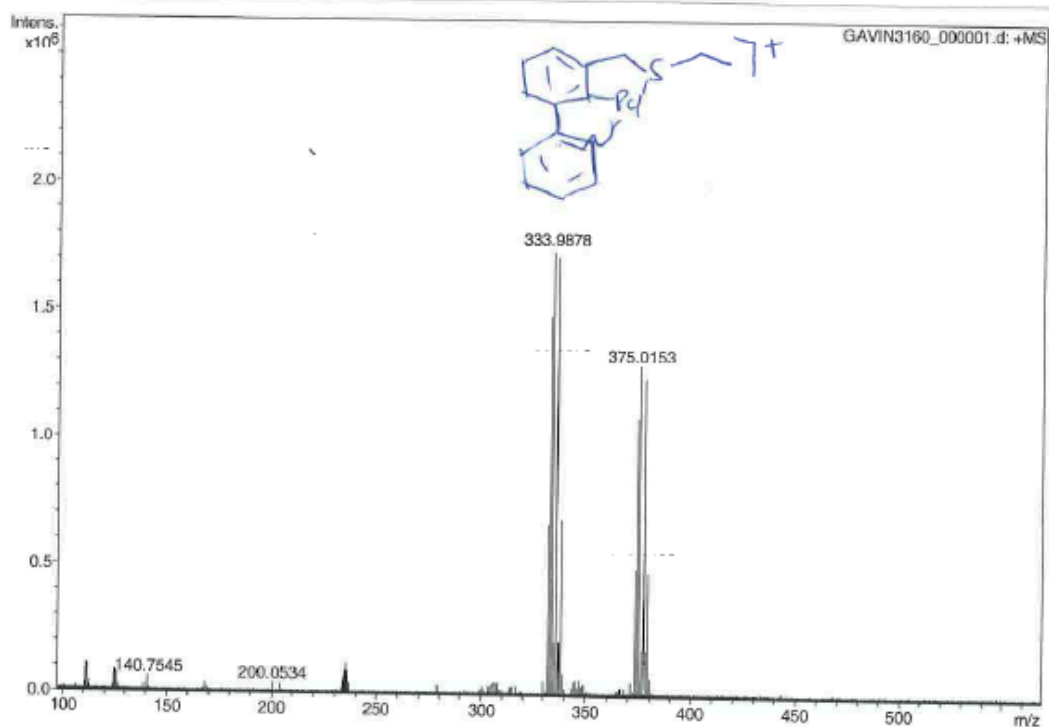

Table 'GenFormulaResults' could not be found in this analysis

## 2-3-[(Ethylsulfanyl)methyl]phenylpyridine chloro-palladacycle, 1b. Elemental Analysis

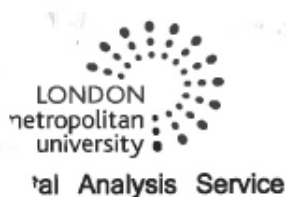

Please send completed form to:

Stephen Boyer  
School of Human Sciences  
Science Centre  
London Metropolitan University  
29 Hornsey Road  
London N7 7DD

Telephone: 020 7133 3605  
Fax: 020 7133 2577  
Email: [s.boyer@londonmet.ac.uk](mailto:s.boyer@londonmet.ac.uk)

|                                                                                                  |
|--------------------------------------------------------------------------------------------------|
| Sample submitted by: Gavin Roffe                                                                 |
| Address: Department of Chemistry, Arundel building, Sussex University, Falmer, Brighton, BN1 9RH |
| Telephone: 07584 291754<br>Email: <a href="mailto:gwr20@sussex.ac.uk">gwr20@sussex.ac.uk</a>     |
| Date Submitted: 12/7/13                                                                          |

Please submit ca. 5 mg of sample.

|                                                    |
|----------------------------------------------------|
| Sample Reference No.: GR 32b                       |
| Name of Compound: NCS Pincer Palladacycle - pyrSEt |
| Molecular Formula: $C_{14}H_{14}ClNPdS$            |
| Stability: Stable to air and moisture              |
| Hazards: Unknown. Standard PPE.                    |
| Other Remarks:                                     |

| Element  | Expected % | Found (1) | Found (2) |  |
|----------|------------|-----------|-----------|--|
| Carbon   | 45.42      | 45.70     | 45.54     |  |
| Hydrogen | 3.81       | 3.70      | 3.75      |  |
| Nitrogen | 3.78       | 3.83      | 3.86      |  |



2-3-[(Propylsulfanyl)methyl]phenylpyridine chloro-palladacycle, 1c.  $^1\text{H}$  NMR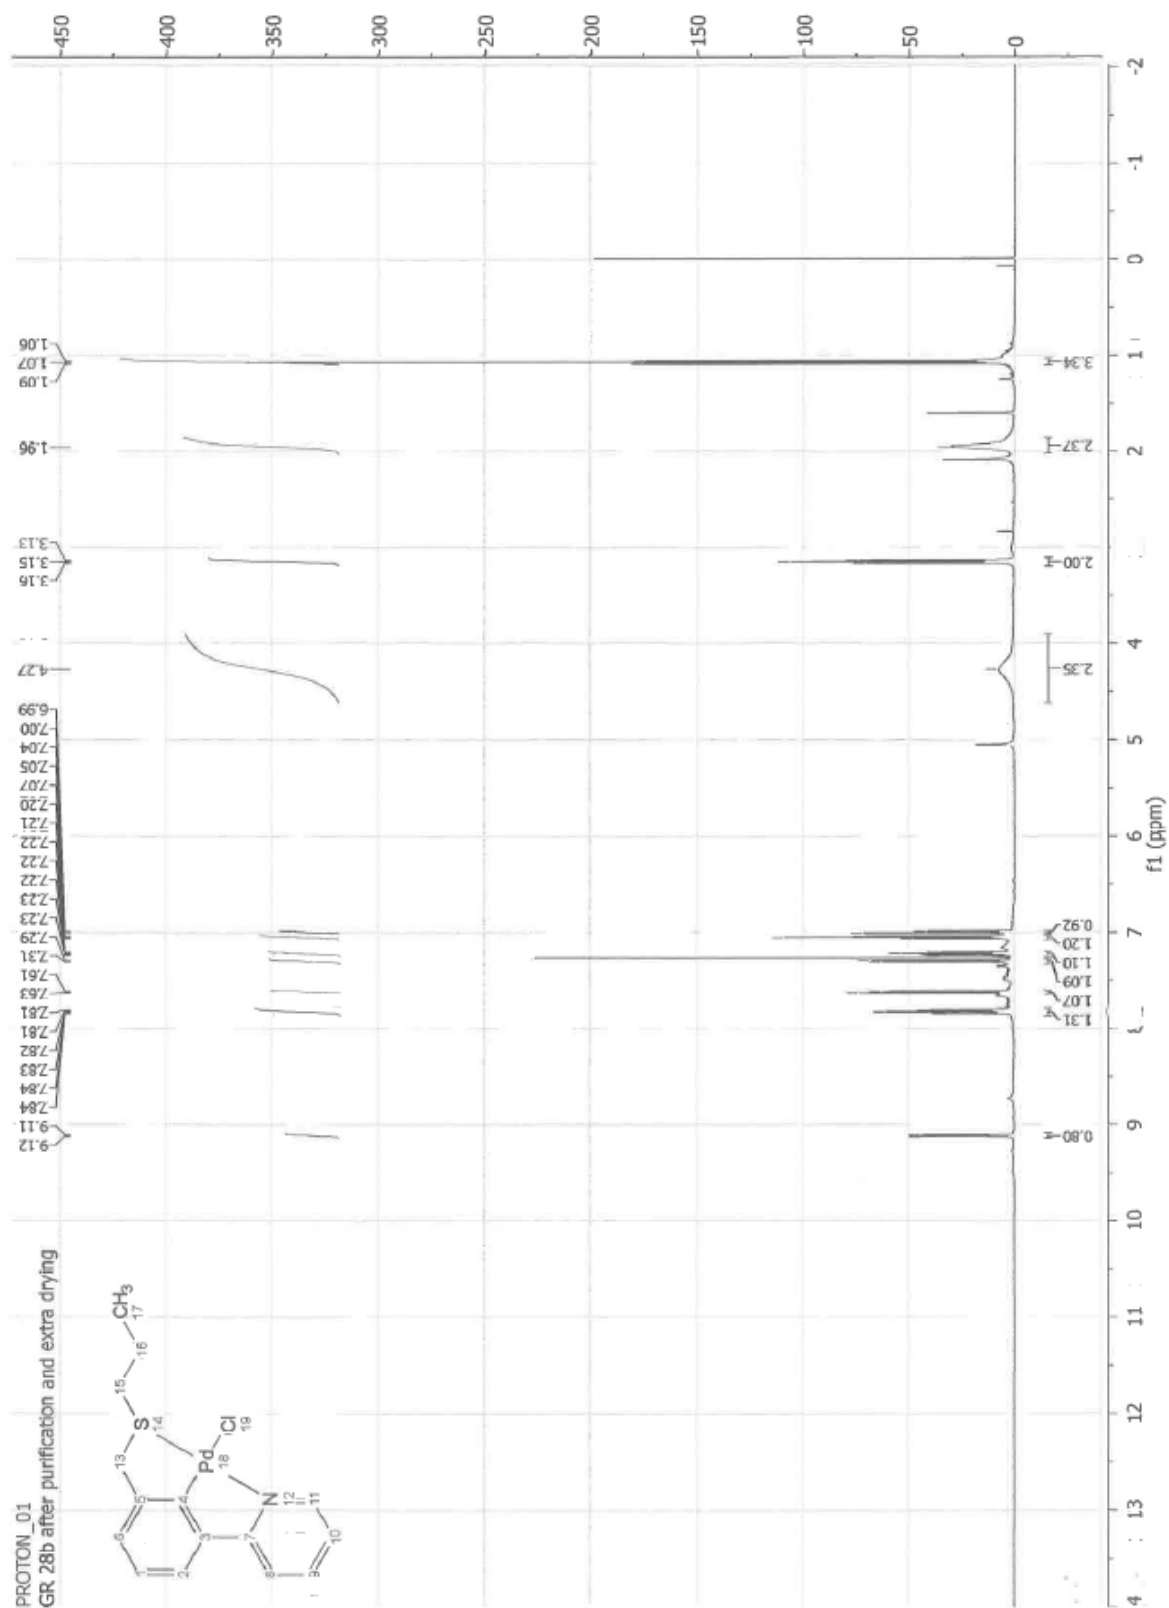

2-3-[(Propylsulfanyl)methyl]phenylpyridine chloro-palladacycle, 1c.  $^{13}\text{C}$  NMR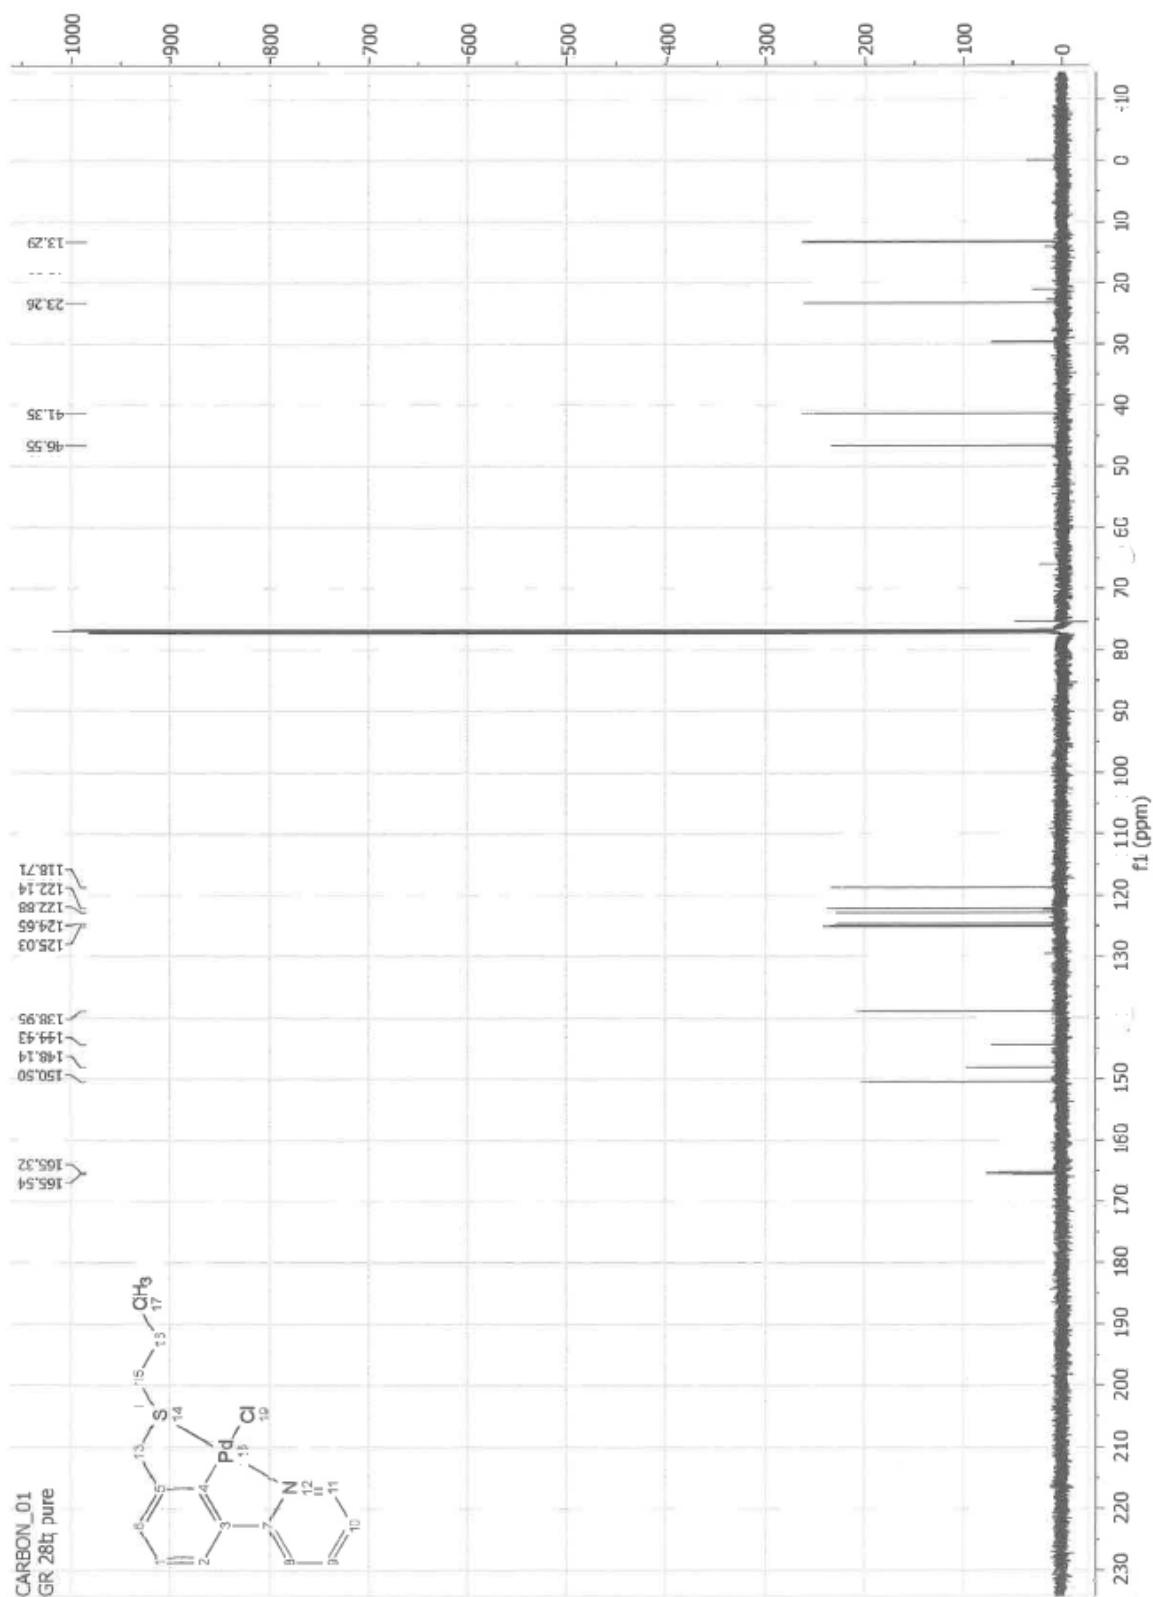

## 2-3-[(Propylsulfanyl)methyl]phenylpyridine chloro-palladacycle, 1c. HRMS

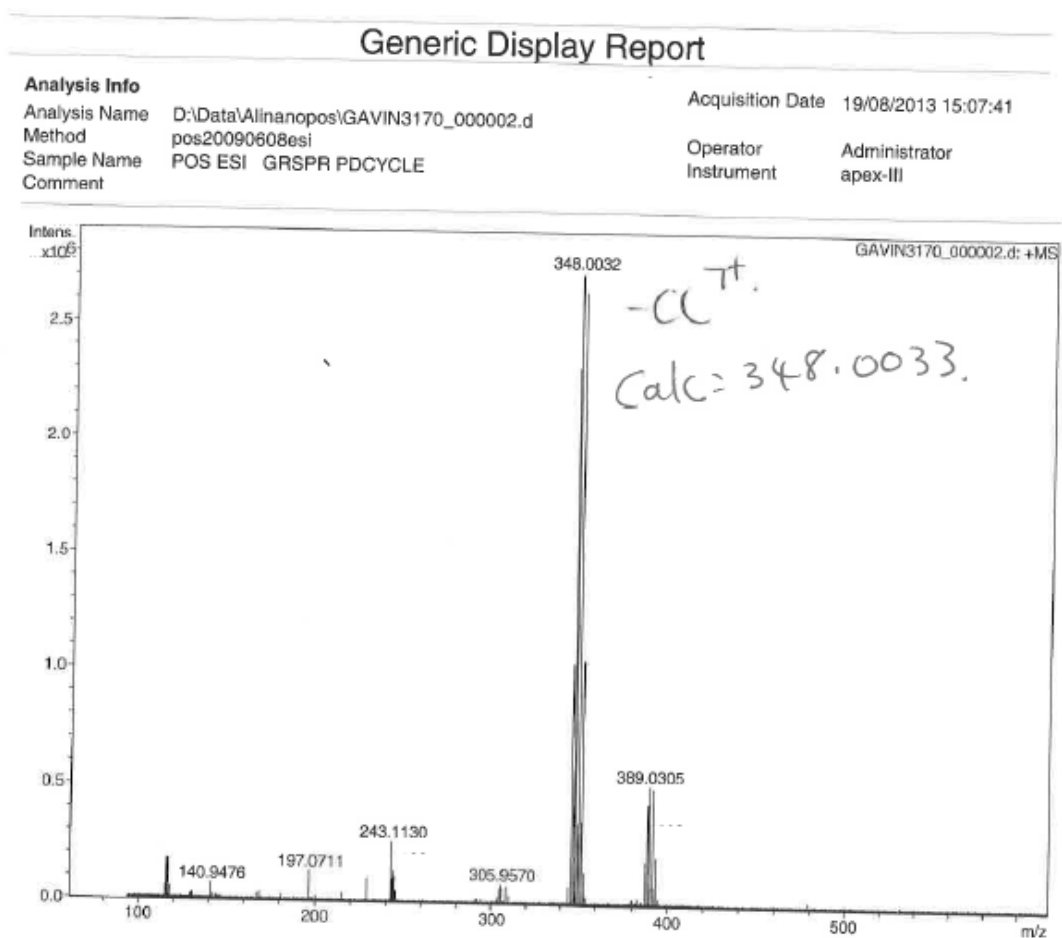

Table 'GenFormulaResults' could not be found in this analysis

## 2-3-[(Propylsulfanyl)methyl]phenylpyridine chloro-palladacycle, 1c. Elemental Analysis

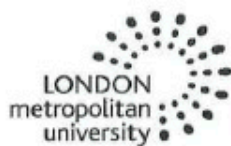

## Elemental Analysis Service

Please send completed form and samples to:

Stephen Boyer  
School of Human Sciences  
Science Centre  
London Metropolitan University  
29 Hornsey Road  
London N7 7DD

Telephone: 020 7133 3605  
Fax: 020 7133 2577  
Email: [s.boyer@londonmet.ac.uk](mailto:s.boyer@londonmet.ac.uk)

|                      |                                                              |
|----------------------|--------------------------------------------------------------|
| Sample submitted by: | Gavin Rofle.                                                 |
| Address:             | Department of Chem, Amstel Building, Uni of Sussex, BN1 9RH. |
| Telephone:           |                                                              |
| Email:               | gwr20@sussex.ac.uk                                           |
| Date Submitted:      | 30/6/14                                                      |

Please submit ca. 5 mg of sample.

|                       |               |
|-----------------------|---------------|
| Sample Reference No.: | GPR28b-4      |
| Name of Compound:     | SPi Polycycle |
| Molecular Formula:    |               |
| Stability:            | ✓             |
| Hazards:              | ✓             |
| Other Remarks:        |               |

| Element  | Expected % | Found (1) | Found (2) |  |
|----------|------------|-----------|-----------|--|
| Carbon   | 46.89      | 47.02     | 47.04     |  |
| Hydrogen | 4.20       | 4.08      | 4.15      |  |
| Nitrogen | 3.65       | 3.56      | 3.60      |  |

2-3-[(Phenylsulfanyl)methyl]phenylpyridine chloro-palladacycle, 1d.  $^1\text{H}$  NMR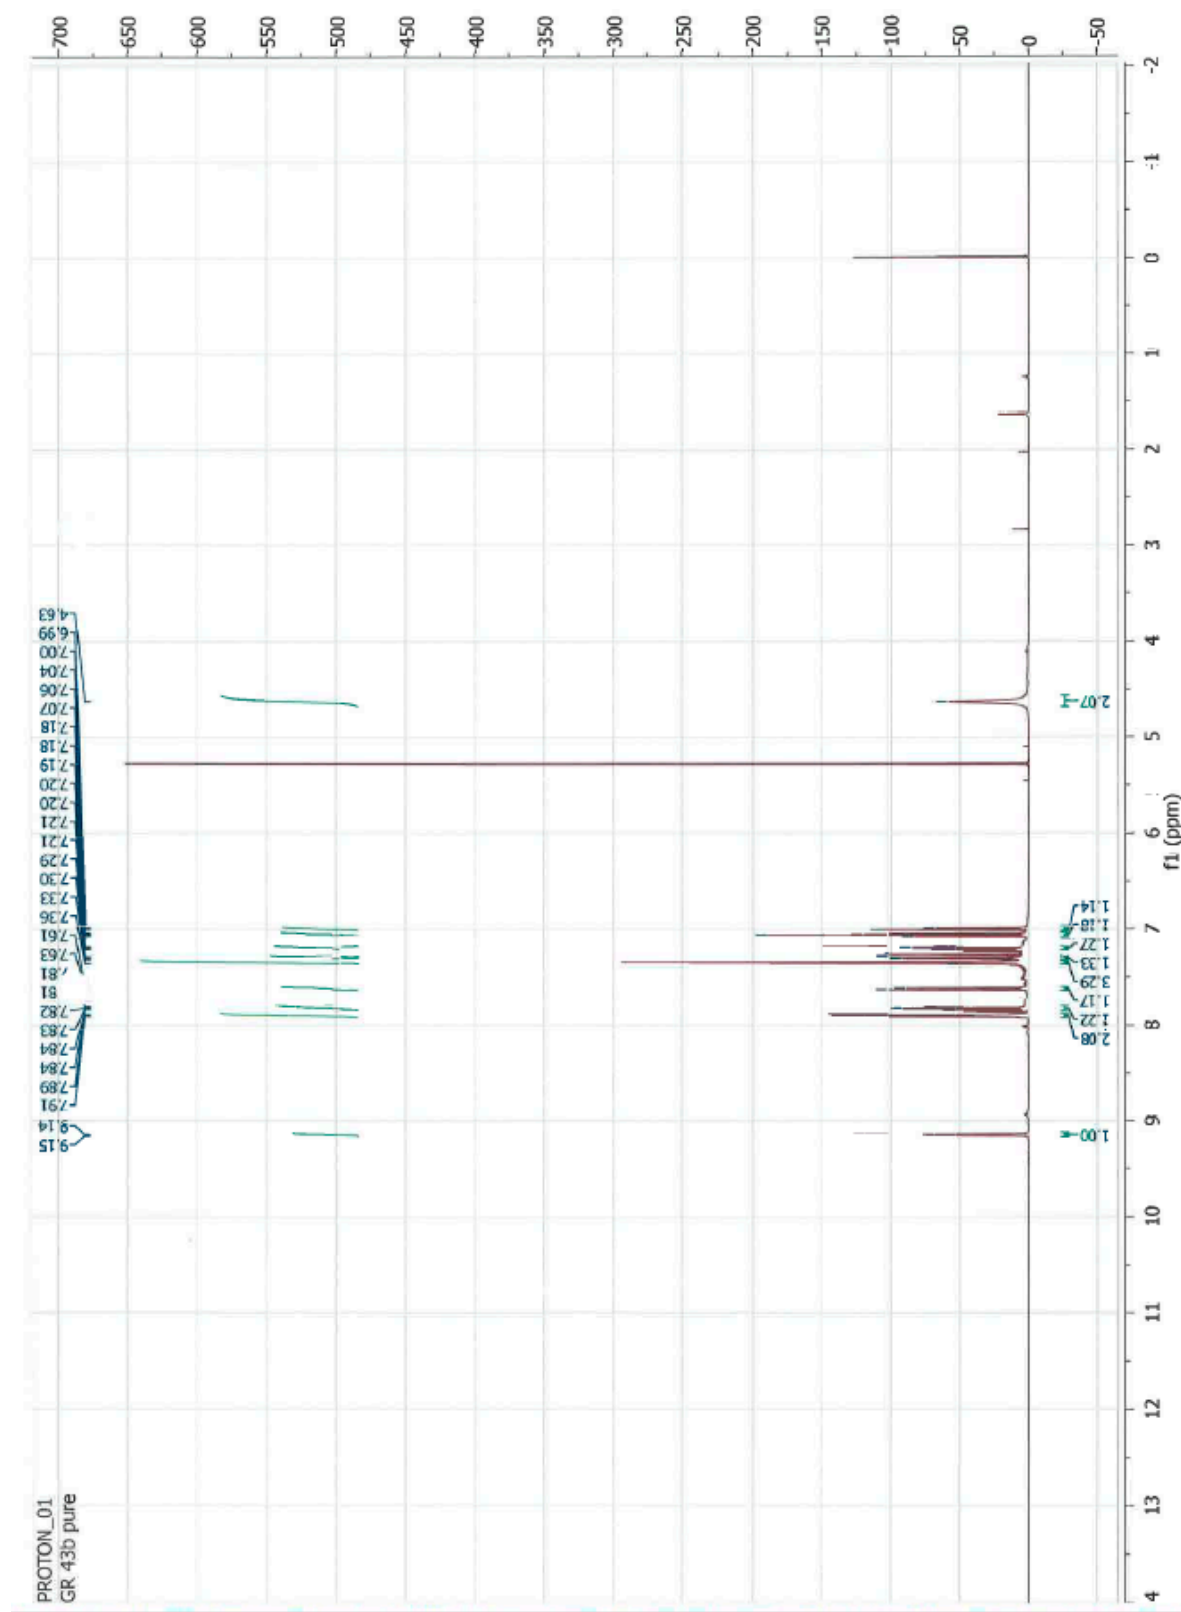

2-3-[(Phenylsulfanyl)methyl]phenylpyridine chloro-palladacycle, 1d.  $^{13}\text{C}$  NMR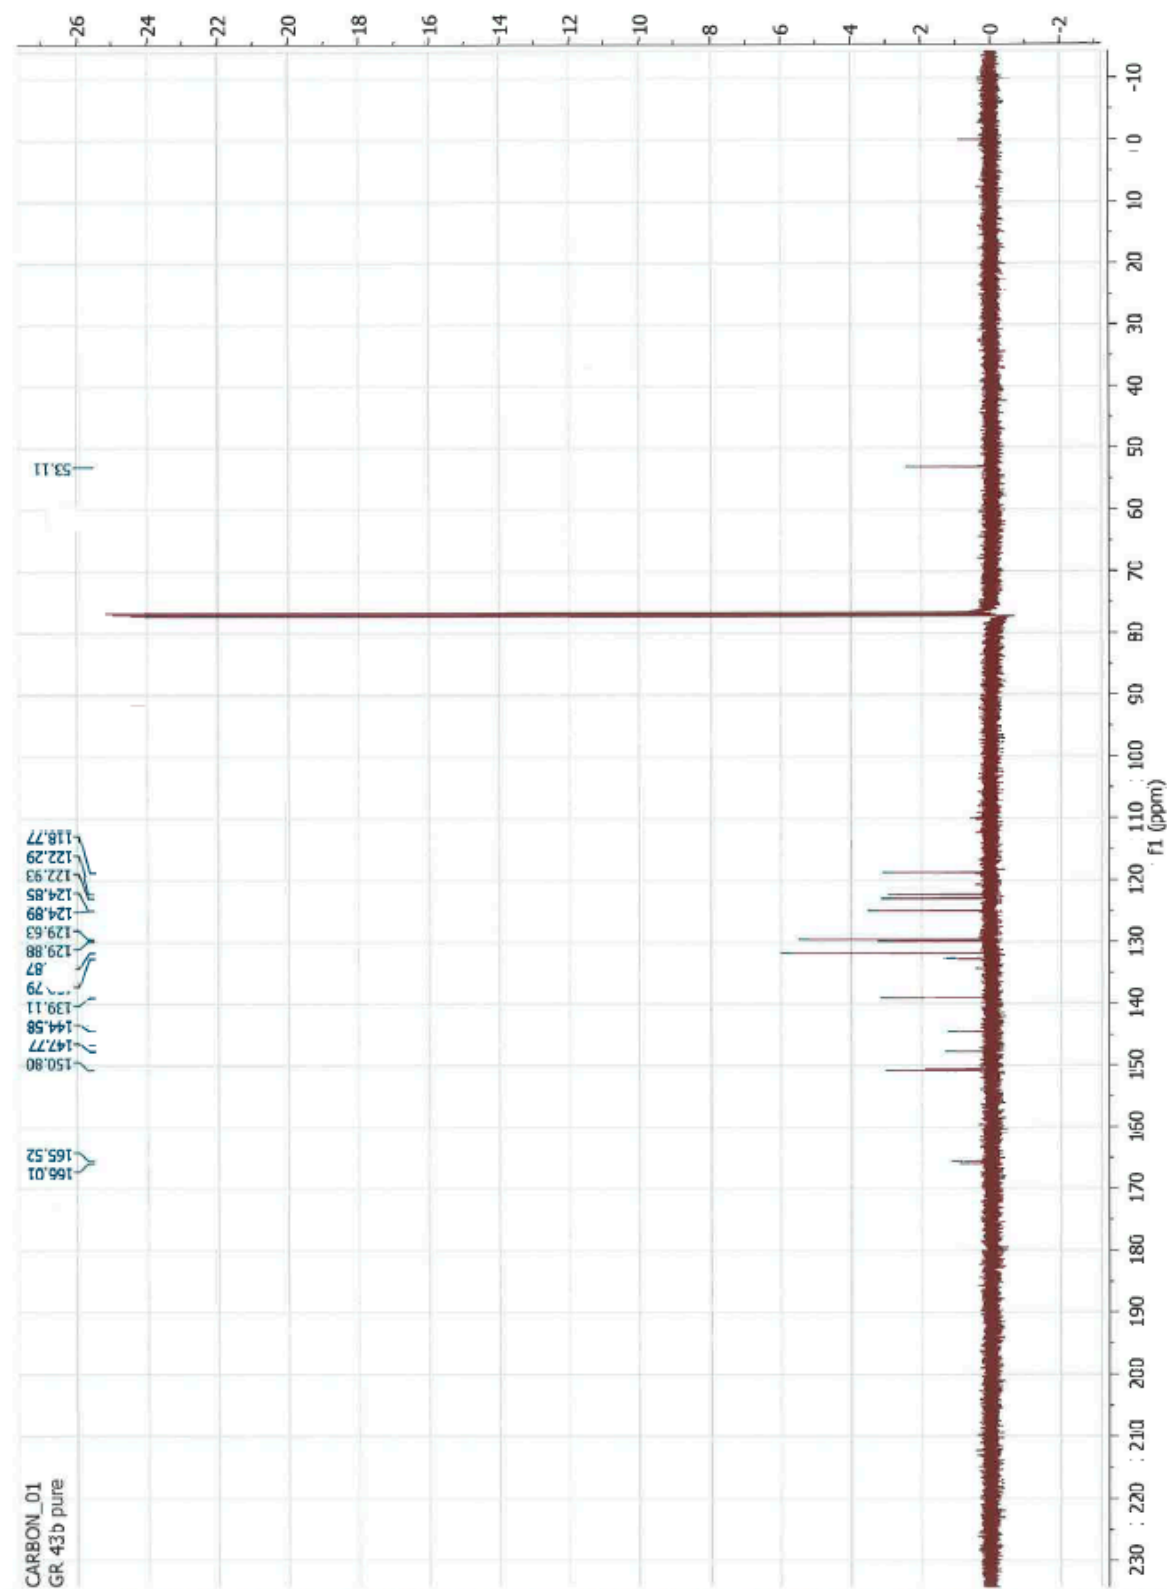

## 2-3-[(Phenylsulfanyl)methyl]phenylpyridine chloro-palladacycle, 1d. HRMS

## Generic Display Report

## Analysis Info

Analysis Name D:\Data\Alinanopos\GAVIN4406A\_000001.d  
Method pos20090608esi  
Sample Name POS ESI GR 43B  
Comment

Acquisition Date 16/05/2014 12:51:25

Operator Administrator  
Instrument apex-III

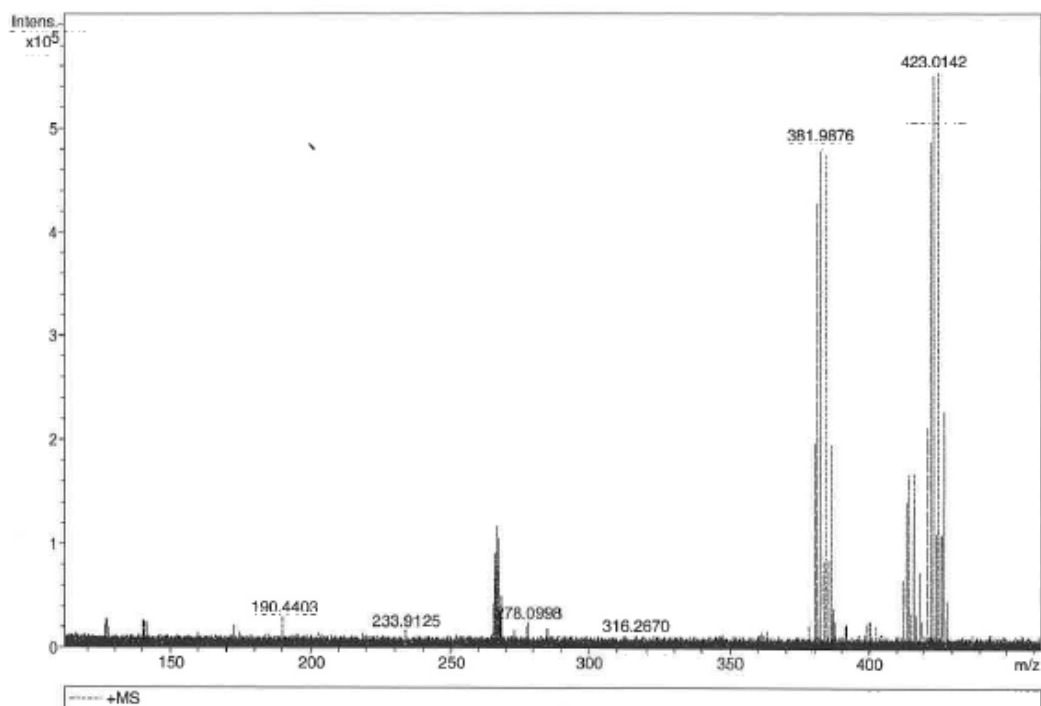

Table 'GenFormulaResults' could not be found in this analysis

## 2-3-[(Phenylsulfanyl)methyl]phenylpyridine chloro-palladacycle, 1d. Elemental Analysis

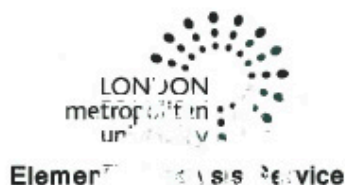

Please send completed form and samples to:

Stephen Boyer  
School of Human Sciences  
Science Centre  
London Metropolitan University  
29 Hornsey Road  
London N7 7DD

Telephone: 020 7133 3605

Fax: 020 7133 2577

Email: [s.boyer@londonmet.ac.uk](mailto:s.boyer@londonmet.ac.uk)

|                                                                                                  |
|--------------------------------------------------------------------------------------------------|
| Sample submitted by: <i>Gavin Rofke</i>                                                          |
| Address: Department of Chemistry, Arundel building, Sussex University, Falmer, Brighton, BN1 9RH |
| Telephone: <i>07584 291754</i>                                                                   |
| Email: <i>gwr20@sussex.ac.uk</i>                                                                 |
| Date Submitted: <i>15/5/14</i>                                                                   |

Please submit ca. 5 mg of sample.

|                                                              |
|--------------------------------------------------------------|
| Sample Reference No.: <i>GR436</i>                           |
| Name of Compound: <i>SPH palladacycle</i>                    |
| Molecular Formula: <i>C<sub>18</sub>H<sub>14</sub>ClWPdS</i> |
| Stability: Stable to air and moisture                        |
| Hazards: Unknown. Standard PPE.                              |
| Other Remarks:                                               |

| Element  | Expected %             | Found (1)    | Found (2)    |  |
|----------|------------------------|--------------|--------------|--|
| Carbon   | <i>51.69</i>           | <i>51.50</i> | <i>51.45</i> |  |
| Hydrogen | <i>3.37</i>            | <i>3.26</i>  | <i>3.28</i>  |  |
| Nitrogen | <del><i>3.35</i></del> | <i>3.41</i>  | <i>3.47</i>  |  |



2-(3-[(4-Methylphenyl)sulfanyl]methylphenyl)pyridine, 1e.  $^1\text{H}$  NMR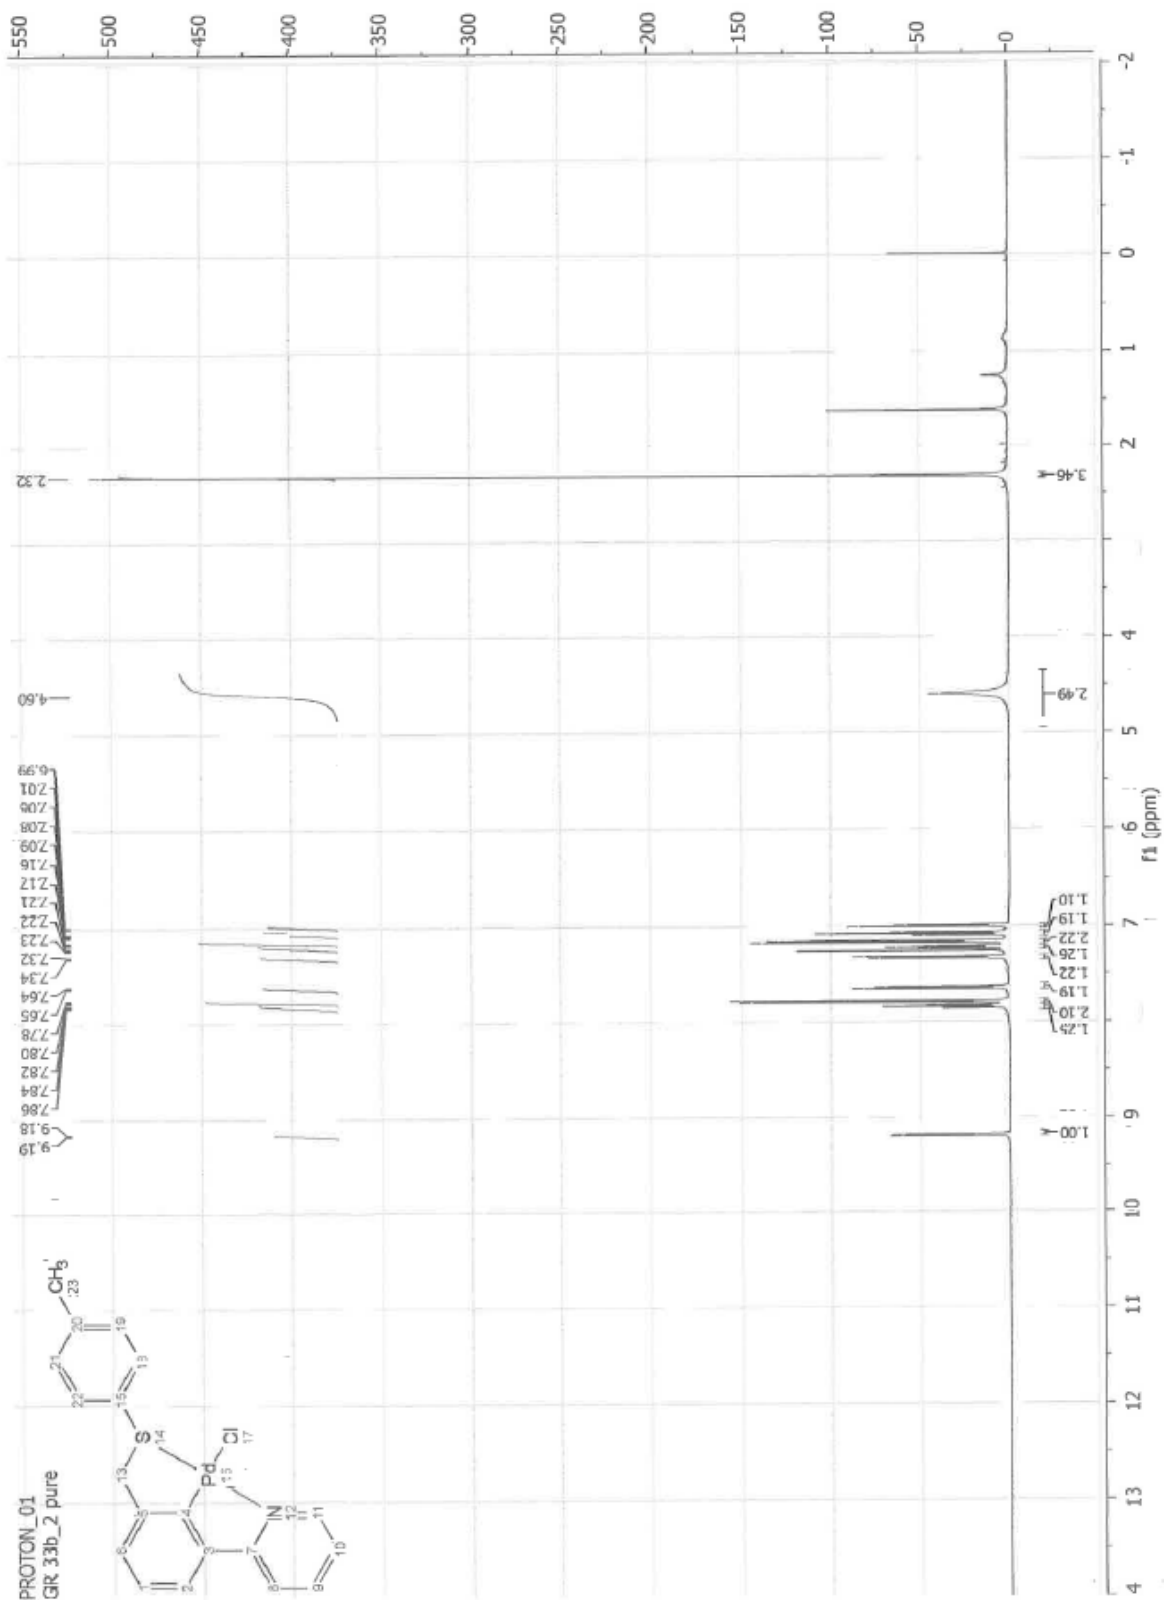

2-(3-[(4-Methylphenyl)sulfanyl]methylphenyl)pyridine, 1e.  $^{13}\text{C}$  NMR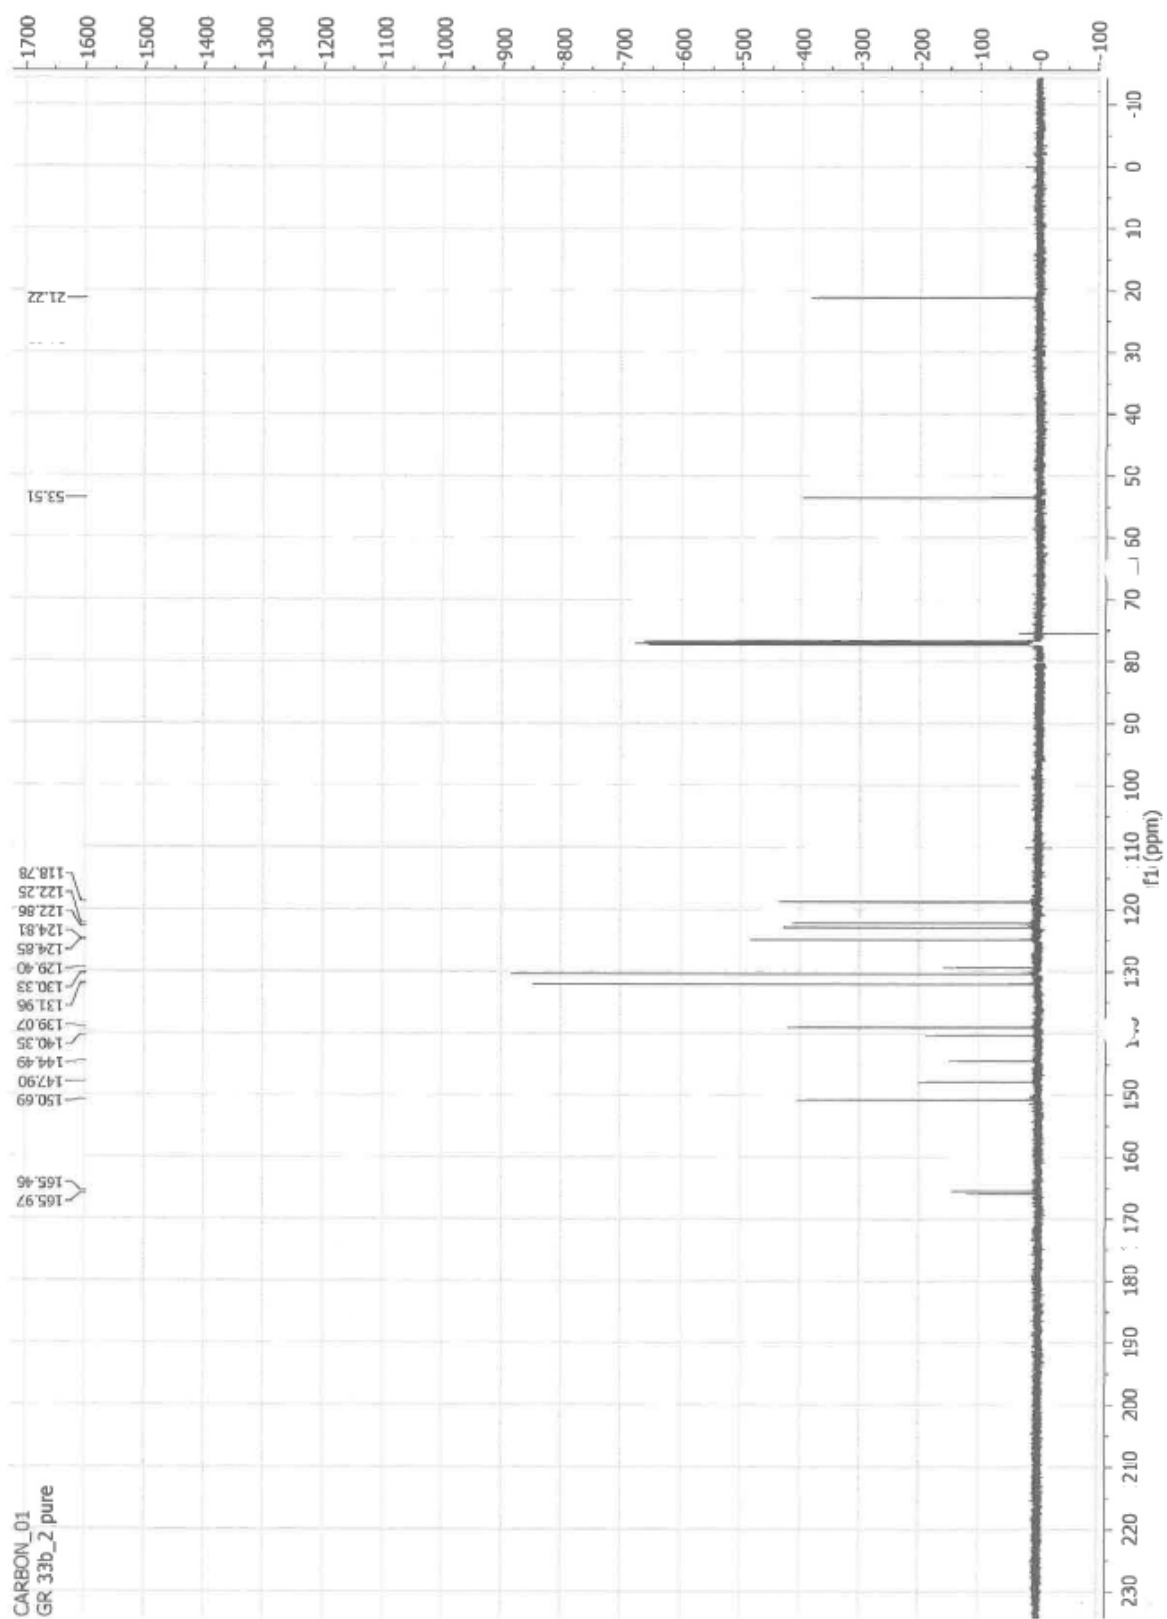

## 2-(3-[(4-Methylphenyl)sulfanyl]methylphenyl)pyridine, 1e. HRMS

## Generic Display Report

## Analysis Info

Analysis Name D:\Data\Allnanopos\GAVIN3159\_000001.d  
Method pos20090608esi  
Sample Name POS ESI GR STOL-PDCYCLE  
Comment

Acquisition Date 12/08/2013 13:40:31

Operator Administrator  
Instrument apex-III

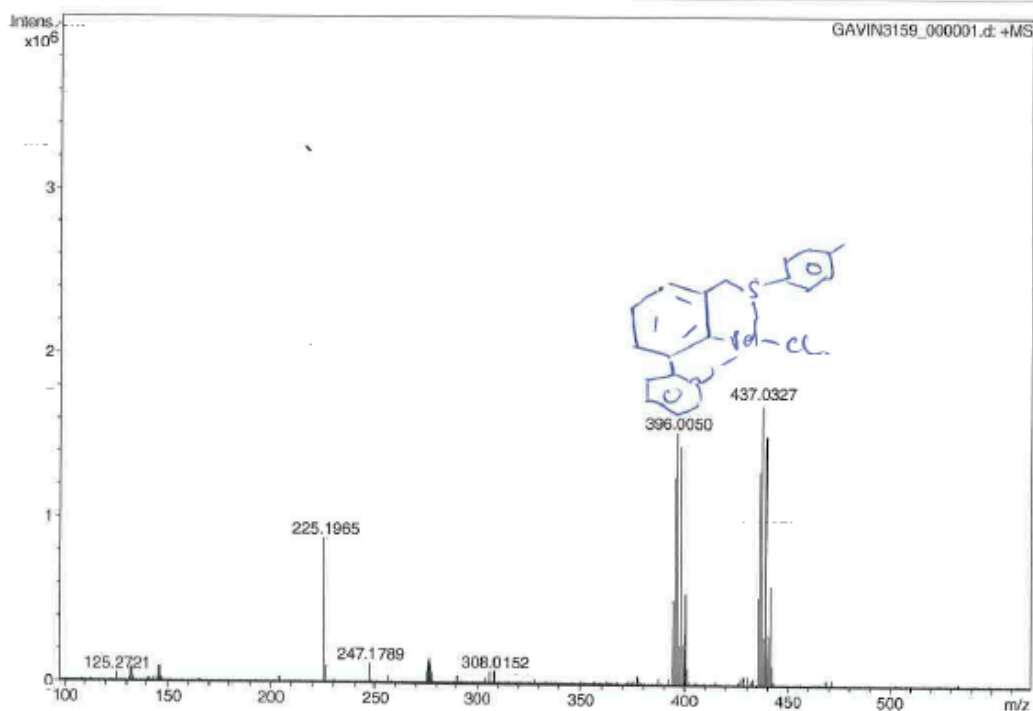

Table 'GenFormulaResults' could not be found in this analysis

## 2-(3-[(4-Methylphenyl)sulfanyl]methylphenyl)pyridine, 1e. Elemental Analysis

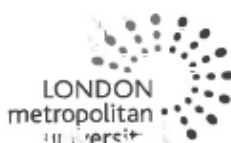

Elemental Analysis Service

Please send completed form and sample

Stephen Boyer  
 School of Human Sciences  
 Science Centre  
 London Metropolitan University  
 29 Hornsey Road  
 London N7 7DD

Telephone: 020 7133 3605  
 Fax: 020 7133 2577  
 Email: [s.boyer@londonmet.ac.uk](mailto:s.boyer@londonmet.ac.uk)

|                                                                                                  |
|--------------------------------------------------------------------------------------------------|
| Sample submitted by: Gavin Roffe                                                                 |
| Address: Department of Chemistry, Arundel building, Sussex University, Falmer, Brighton, BN1 9RH |
| Telephone: 07584 291754<br>Email: <a href="mailto:gwr20@sussex.ac.uk">gwr20@sussex.ac.uk</a>     |
| Date Submitted: 12/7/13                                                                          |

Please submit ca. 5 mg of sample.

|                                                           |
|-----------------------------------------------------------|
| Sample Reference No.: GR 33b_2                            |
| Name of Compound: NCS Pincer Palladacycle - pyrSTol       |
| Molecular Formula: C <sub>19</sub> H <sub>16</sub> ClNPdS |
| Stability: Stable to air and moisture                     |
| Hazards: Unknown. Standard PPE.                           |
| Other Remarks:                                            |

| Element  | Expected % | Found (1) | Found (2) |  |
|----------|------------|-----------|-----------|--|
| Carbon   | 52.79      | 52.03     | 52.62     |  |
| Hydrogen | 3.73       | 3.84      | 3.82      |  |
| Nitrogen | 3.24       | 3.29      | 3.23      |  |

2-(3-[(4-Methoxyphenyl)sulfanyl]methylphenyl)pyridine, 1f.  $^1\text{H}$  NMR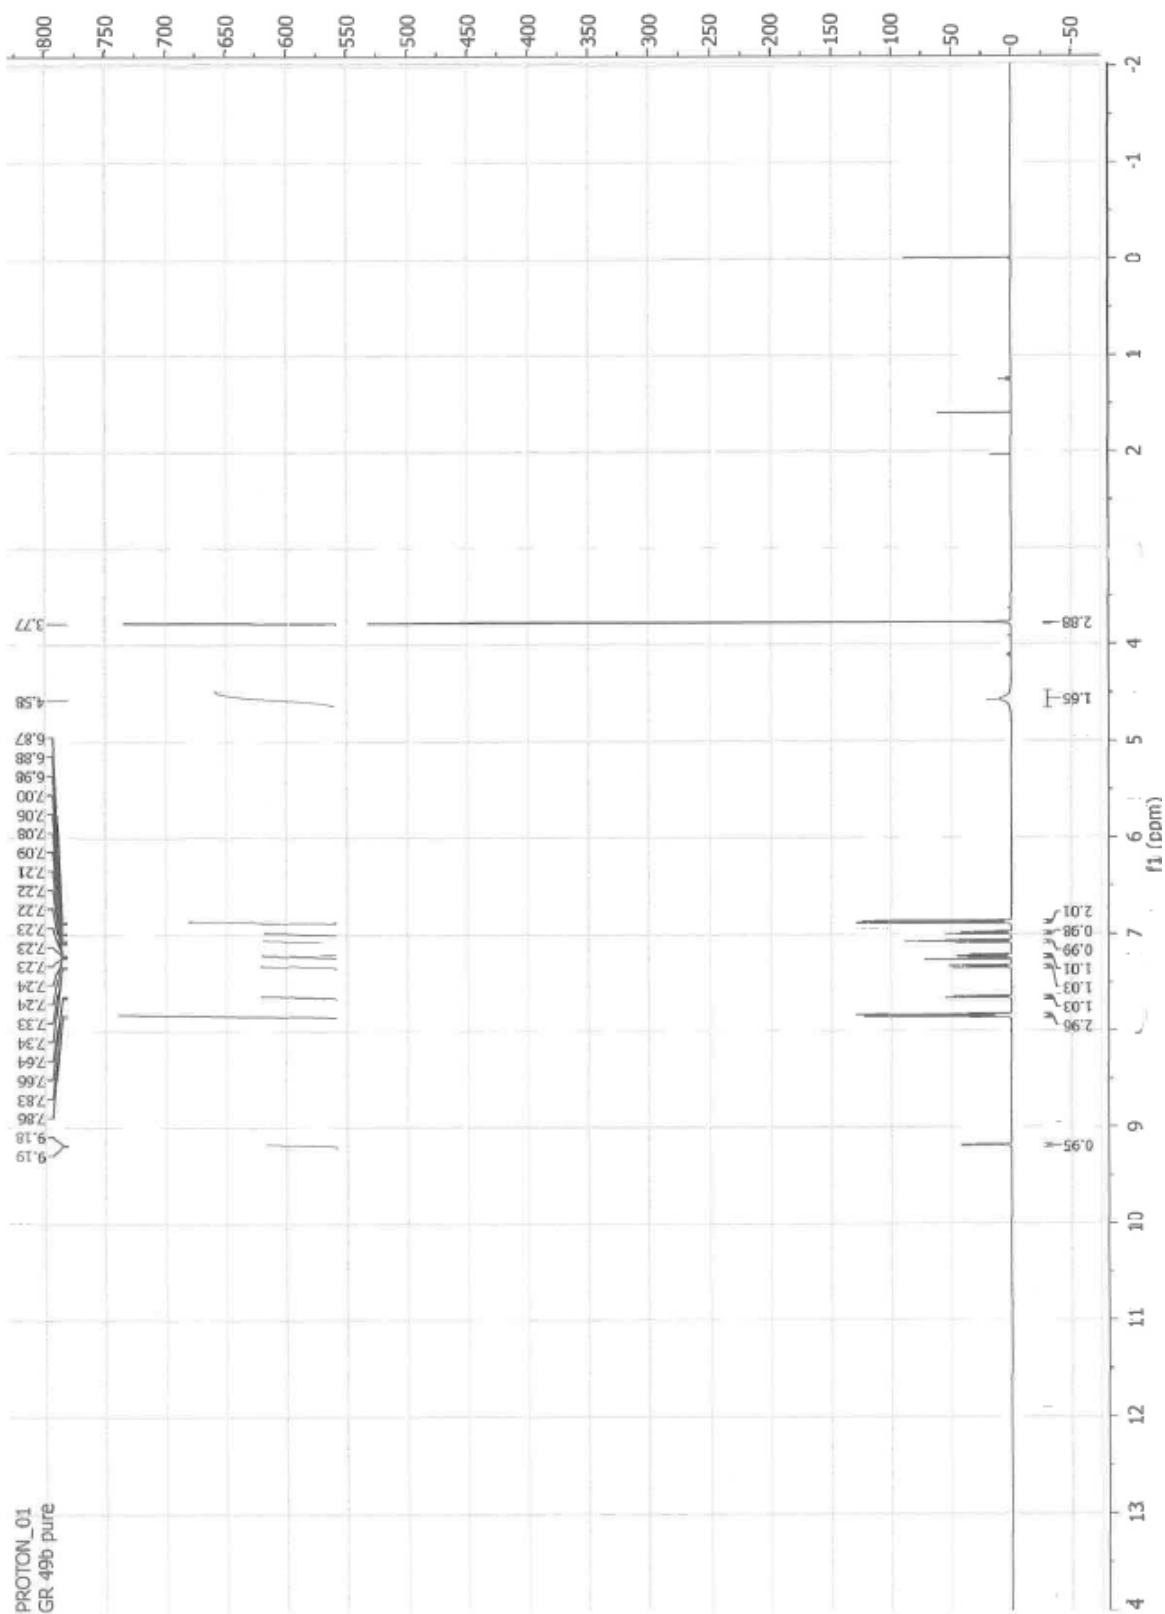

2-(3-[(4-Methoxyphenyl)sulfonyl]methylphenyl)pyridine, 1f.  $^{13}\text{C}$  NMR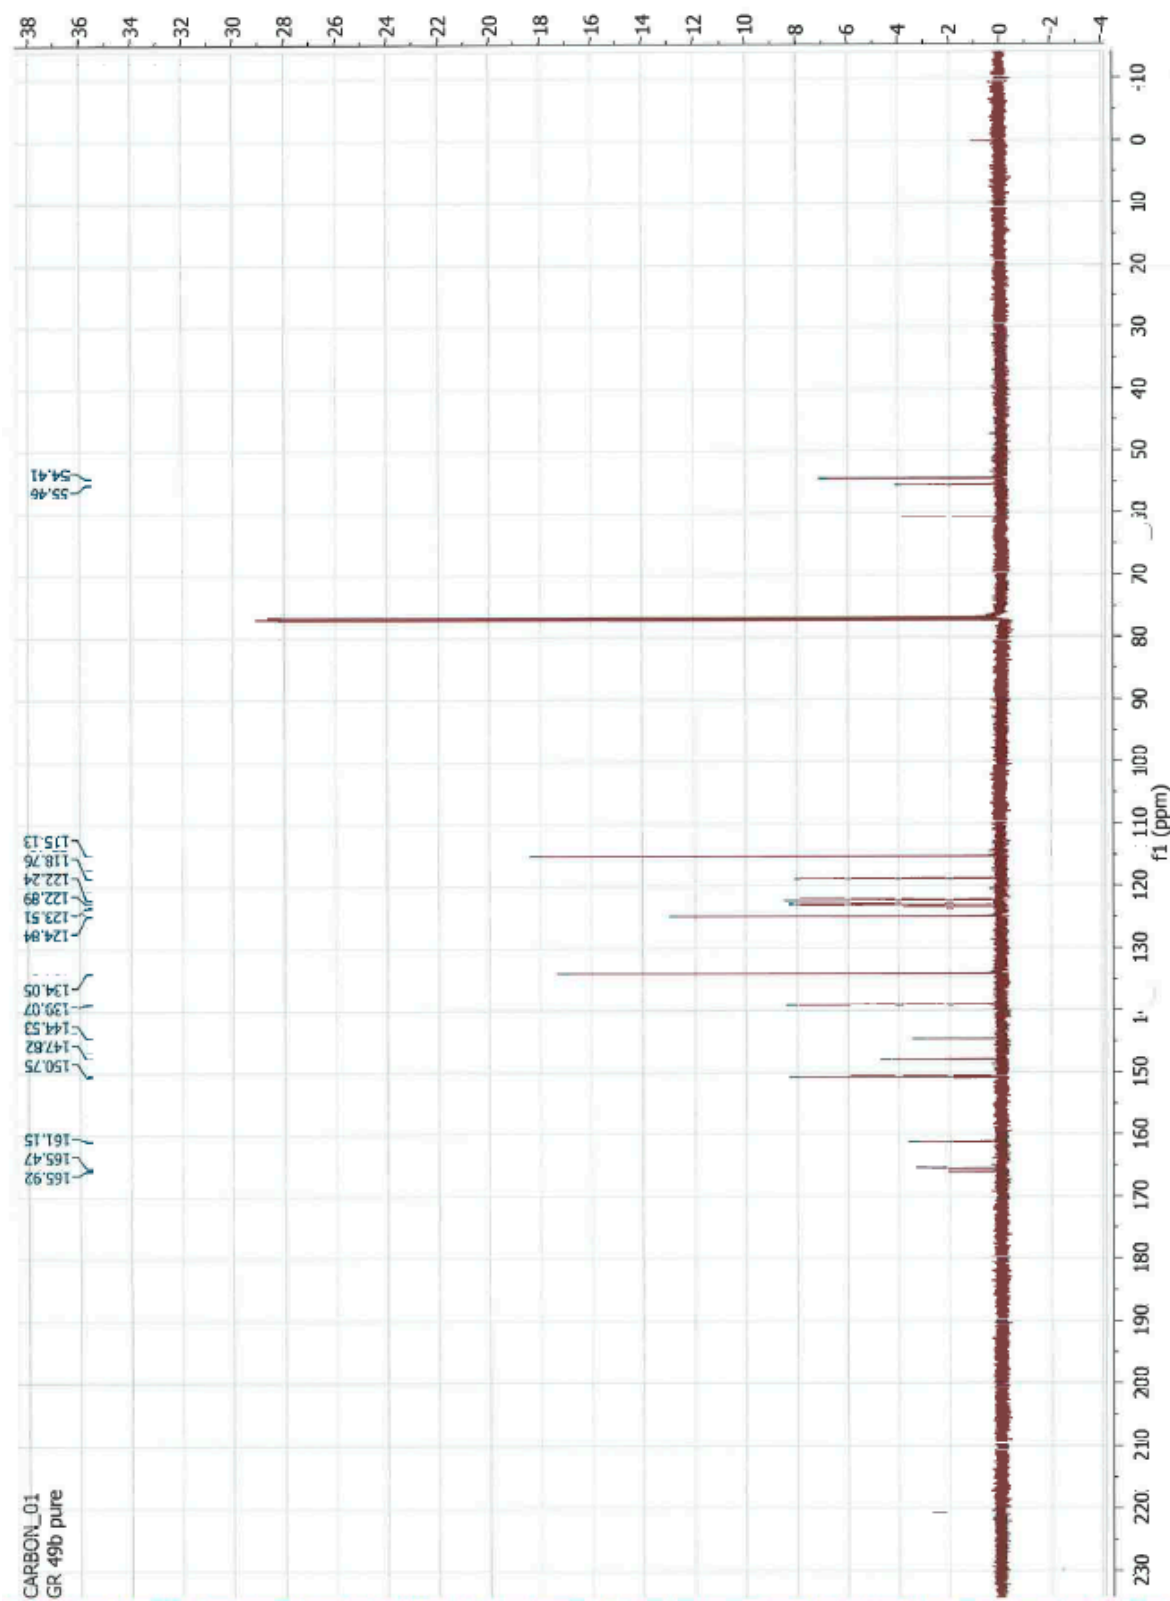

## 2-(3-[(4-Methoxyphenyl)sulfanyl]methylphenyl)pyridine, 1f. HRMS

## Generic Display Report

## Analysis Info

Analysis Name D:\Data\Alinanopos\GAVIN4411\_000001.d  
Method pos20090608esi  
Sample Name POS ESI GR 49B  
Comment

Acquisition Date 19/05/2014 16:39:58

Operator Administrator  
Instrument apex-III

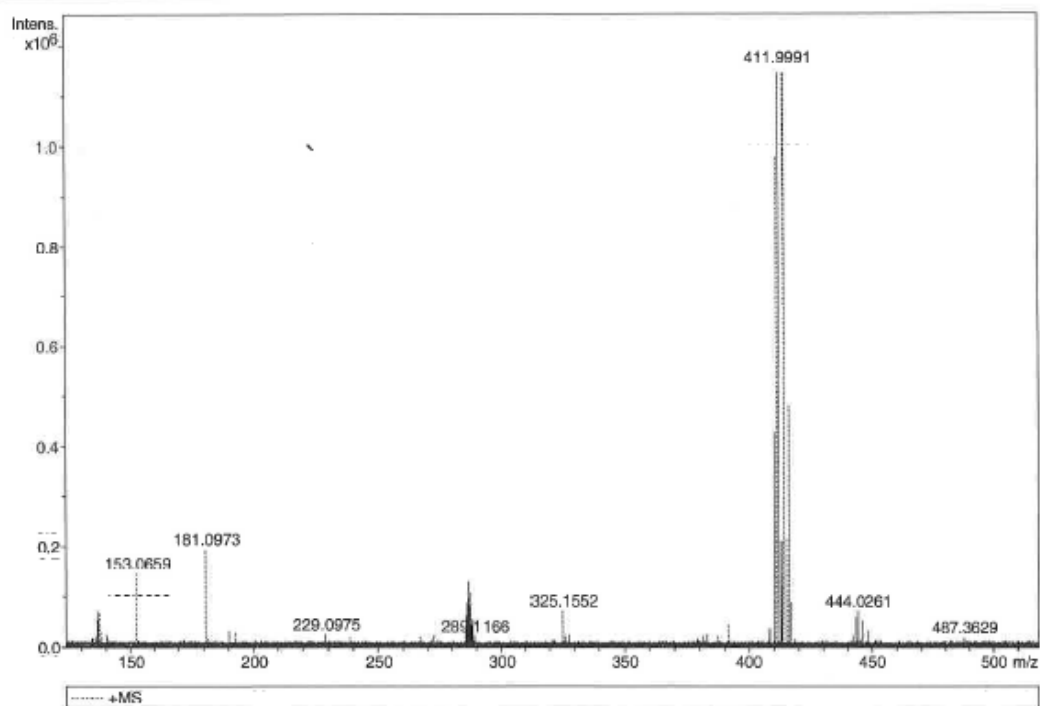

Table 'GenFormulaResults' could not be found in this analysis

## 2-(3-[(4-Methoxyphenyl)sulfonyl]methylphenyl)pyridine, 1f. Elemental Analysis

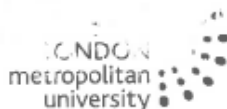

## Elemental Analysis Service

Please send completed form and samples to:

Stephen Boyer  
School of Human Sciences  
Science Centre  
London Metropolitan University  
29 Hornsey Road  
London N7 7DD

Telephone: 020 7133 3605  
Fax: 020 7133 2577  
Email: [s.boyer@londonmet.ac.uk](mailto:s.boyer@londonmet.ac.uk)

|                                                                                                  |
|--------------------------------------------------------------------------------------------------|
| Sample submitted by: Gavin Roffe                                                                 |
| Address: Department of Chemistry, Arundel building, Sussex University, Falmer, Brighton, BN1 9RH |
| Telephone: 07584 291754<br>Email: <a href="mailto:gwr20@sussex.ac.uk">gwr20@sussex.ac.uk</a>     |
| Date Submitted: 18/11/13                                                                         |

Please submit ca. 5 mg of sample.

|                                                            |
|------------------------------------------------------------|
| Sample Reference No.: GR 49b                               |
| Name of Compound: SCN Pincer Palladacycle - pyrNSOMe       |
| Molecular Formula: C <sub>19</sub> H <sub>16</sub> ClNOPdS |
| Stability: Stable to air and moisture                      |
| Hazards: Unknown. Standard PPE.                            |
| Other Remarks:                                             |

| Element  | Expected % | Found (1) | Found (2) |  |
|----------|------------|-----------|-----------|--|
| Carbon   | 50.91      | 50.73     | 50.80     |  |
| Hydrogen | 3.60       | 3.51      | 3.47      |  |
| Nitrogen | 3.12       | 3.17      | 3.19      |  |
